1 **TITLE**

2 **Full title:** Whole genome sequencing of pharmacogenetic drug response in racially  
3 and ethnically diverse children with asthma

4 **Short title:** Pharmacogenetic drug response in ethnically diverse children with  
5 asthma

6 **AUTHORS**

7 Angel C.Y. Mak<sup>1¶\*</sup>, Marquitta J. White<sup>1¶</sup>, Zachary A. Szpiech<sup>2¶</sup>, Walter L. Eckalbar<sup>1¶</sup>,  
8 Sam S. Oh<sup>1</sup>, Maria Pino-Yanes<sup>3,4</sup>, Donglei Hu<sup>1</sup>, Pagé Goddard<sup>1</sup>, Scott Huntsman<sup>1</sup>,  
9 Joshua Galanter<sup>1</sup>, Dara G. Torgerson<sup>1</sup>, Ann Chen Wu<sup>5,6</sup>, Blanca E. Himes<sup>7</sup>, Soren  
10 Germer<sup>8</sup>, Julia M. Vogel<sup>8</sup>, Karen L. Bunting<sup>8</sup>, Celeste Eng<sup>1</sup>, Sandra Salazar<sup>1</sup>, Kevin L.  
11 Keys<sup>1</sup>, Jennifer Liberto<sup>1</sup>, Thomas J. Nuckton<sup>1</sup>, Thomas A. Nguyen<sup>1</sup>, Pui-Yan Kwok<sup>9,10</sup>,  
12 Albert M. Levin<sup>11</sup>, Juan C. Celedón<sup>12</sup>, Erick Forno<sup>12</sup>, Hakon Hakonarson<sup>13,14</sup>, Patrick  
13 M. Sleiman<sup>13,14</sup>, Amber Dahlin<sup>5</sup>, Kelan G. Tantisira<sup>5</sup>, Scott T. Weiss<sup>5</sup>, Denise  
14 Serebrisky<sup>15</sup>, Emerita Brigino-Buenaventura<sup>16</sup>, Harold J. Farber<sup>17</sup>, Kelley Meade<sup>18</sup>,  
15 Michael A. Lenoir<sup>19</sup>, Pedro C. Avila<sup>20,#a</sup>, Saunak Sen<sup>1,#b</sup>, Shannon M. Thyne<sup>21</sup>, William  
16 Rodriguez-Cintron<sup>22</sup>, Cheryl A. Winkler<sup>23</sup>, Andrés Moreno-Estrada<sup>24</sup>, Karla  
17 Sandoval<sup>24</sup>, Jose R. Rodriguez-Santana<sup>25</sup>, Rajesh Kumar<sup>26,27</sup>, L. Keoki Williams<sup>28,29</sup>,  
18 Nadav Ahituv<sup>1</sup>, Elad Ziv<sup>1</sup>, Max A. Seibold<sup>30</sup>, Robert B. Darnell<sup>8,31,32</sup>, Noah Zaitlen<sup>1</sup>,  
19 Ryan D. Hernandez<sup>2,10,33</sup>, Esteban G. Burchard<sup>1,2</sup> on behalf of the Trans-Omics for  
20 Precision Medicine Whole Genome Sequencing Program (TOPMed)^

## 21 **AFFILIATIONS**

22 <sup>1</sup> Department of Medicine, University of California San Francisco, San Francisco,  
23 California, USA.

24 <sup>2</sup> Department of Bioengineering and Therapeutic Sciences, University of California  
25 San Francisco, San Francisco, California, USA.

26 <sup>3</sup> Research Unit, Hospital Universitario N.S. de Candelaria, Universidad de La Laguna,  
27 Santa Cruz de Tenerife, Spain.

28 <sup>4</sup> CIBER de Enfermedades Respiratorias, Instituto de Salud Carlos III, Madrid, Spain.

29 <sup>5</sup> Channing Division of Network Medicine, Department of Medicine, Brigham and  
30 Women's Hospital and Harvard Medical School, Boston, Massachusetts, USA.

31 <sup>6</sup> Precision Medicine Translational Research (PRoMoTeR) Center, Department of  
32 Population Medicine, Harvard Medical School and Pilgrim Health Care Institute,  
33 Boston, Massachusetts, USA.

34 <sup>7</sup> Department of Biostatistics, Epidemiology and Informatics, University of  
35 Pennsylvania, Philadelphia, Pennsylvania, USA.

36 <sup>8</sup> New York Genome Center, New York, New York, USA.

37 <sup>9</sup> Cardiovascular Research Institute, University of California San Francisco, San  
38 Francisco, California, USA.

39 <sup>10</sup> Institute for Human Genetics, University of California San Francisco, San  
40 Francisco, California, USA.

41 <sup>11</sup> Department of Public Health Sciences, Henry Ford Health System, Detroit  
42 Michigan, USA.

- 43 <sup>12</sup> Division of Pediatric Pulmonary Medicine, Allergy and Immunology, University of  
44 Pittsburgh School of Medicine, Pittsburgh, Pennsylvania, USA.
- 45 <sup>13</sup> Center for Applied Genomics, The Children’s Hospital of Philadelphia Research  
46 Institute, Philadelphia, Pennsylvania, USA.
- 47 <sup>14</sup> Department of Pediatrics, Perelman School of Medicine, University of  
48 Pennsylvania, Philadelphia, Pennsylvania, USA.
- 49 <sup>15</sup> Pediatric Pulmonary Division, Jacobi Medical Center, Bronx, New York, USA.
- 50 <sup>16</sup> Department of Allergy and Immunology, Kaiser Permanente Vallejo Medical  
51 Center, Vallejo, California, USA.
- 52 <sup>17</sup> Department of Pediatrics, Baylor College of Medicine and Texas Children’s  
53 Hospital, Houston, Texas, USA.
- 54 <sup>18</sup> Children’s Hospital and Research Center, Oakland, California, USA.
- 55 <sup>19</sup> Bay Area Pediatrics, Oakland, California, USA.
- 56 <sup>20</sup> Department of Medicine, Northwestern University, Chicago, Illinois, USA.
- 57 <sup>21</sup> Department of Pediatrics, David Geffen School of Medicine, University of  
58 California, Los Angeles, Los Angeles, California, USA.
- 59 <sup>22</sup> Veterans Caribbean Health Care System, San Juan, Puerto Rico.
- 60 <sup>23</sup> Basic Science Laboratory, Center for Cancer Research, National Cancer Institute,  
61 Leidos Biomedical Research, Frederick National Laboratory, Frederick, Maryland,  
62 USA.
- 63 <sup>24</sup> National Laboratory of Genomics for Biodiversity (UGA-LANGEBIO), CINVESTAV,  
64 Irapuato, Guanajuato, Mexico.

65 <sup>25</sup> Centro de Neumologia Pediatrica, San Juan, Puerto Rico.

66 <sup>26</sup> Feinberg School of Medicine's Division of Allergy and Immunology, Northwestern  
67 University, Chicago, Illinois, USA.

68 <sup>27</sup> Ann & Robert H. Lurie Children's Hospital of Chicago, Chicago, Illinois, USA.

69 <sup>28</sup> Department of Internal Medicine, Henry Ford Health System, Detroit, Michigan,  
70 USA.

71 <sup>29</sup> Center for Health Policy and Health Services Research, Henry Ford Health System,  
72 Detroit, Michigan, USA.

73 <sup>30</sup> Center for Genes, Environment and Health, Department of Pediatrics, National  
74 Jewish Health, Denver, Colorado, USA.

75 <sup>31</sup> Laboratory of Molecular Neuro-Oncology, The Rockefeller University, New York,  
76 New York, USA.

77 <sup>32</sup> Howard Hughes Medical Institute, The Rockefeller University, New York, New  
78 York, USA.

79 <sup>33</sup> Quantitative Biosciences Institute, University of California San Francisco, San  
80 Francisco, California, USA.

81 <sup>#a</sup>Current address: Allergy & ENT Associates. The Woodlands, Texas, USA.

82 <sup>#b</sup>Current address: Division of Biostatistics, Department of Preventive Medicine,  
83 University of Tennessee Health Science Center, Memphis, Tennessee, USA.

84

85 ¶ These authors contributed equally to this work

86

87 \* Correspondence and material requests should be addressed to Angel C.Y. Mak

88 ([angel.mak@ucsf.edu](mailto:angel.mak@ucsf.edu))

89 ^ Membership of the TOPMed team is provided in the Acknowledgments.

90 **ABSTRACT**

91 Asthma is the most common chronic disease of children, with significant  
92 racial/ethnic differences in prevalence, morbidity, mortality and therapeutic  
93 response. Albuterol, a bronchodilator medication, is the first-line therapy for asthma  
94 treatment worldwide. We performed the largest whole genome sequencing (WGS)  
95 pharmacogenetics study to date using data from 1,441 minority children with  
96 asthma who had extremely high or low bronchodilator drug response (BDR). We  
97 identified population-specific and shared pharmacogenetic variants associated with  
98 BDR, including genome-wide significant ( $p < 3.53 \times 10^{-7}$ ) and suggestive ( $p < 7.06 \times$   
99  $10^{-6}$ ) loci near genes previously associated with lung capacity (*DNAH5*), immunity  
100 (*NFKB1* and *PLCB1*), and  $\beta$ -adrenergic signaling pathways (*ADAMTS3* and *COX18*).  
101 Functional analyses centered on *NFKB1* revealed potential regulatory function of  
102 our BDR-associated SNPs in bronchial smooth muscle cells. Specifically, these  
103 variants are in linkage disequilibrium with SNPs in a functionally active enhancer,  
104 and are also expression quantitative trait loci (eQTL) for a neighboring gene,  
105 *SLC39A8*. Given the lack of other asthma study populations with WGS data on  
106 minority children, replication of our rare variant associations is infeasible. We  
107 attempted to replicate our common variant findings in five independent studies  
108 with GWAS data. The age-specific associations previously found in asthma and  
109 asthma-related traits suggest that the over-representation of adults in our  
110 replication populations may have contributed to our lack of statistical replication,  
111 despite the functional relevance of the *NFKB1* variants demonstrated by our

112 functional assays. Our study expands the understanding of pharmacogenetic  
113 analyses in racially/ethnically diverse populations and advances the foundation for  
114 precision medicine in at-risk and understudied minority populations.

115 **AUTHOR SUMMARY**

116 Asthma is the most common chronic disease among children. Albuterol, a  
117 bronchodilator medication, is the first-line therapy for asthma treatment  
118 worldwide. In the U.S., asthma prevalence is the highest among Puerto Ricans,  
119 intermediate among African Americans and lowest in Whites and Mexicans. Asthma  
120 disparities extend to mortality, which is four- to five-fold higher in Puerto Ricans  
121 and African Americans compared to Mexicans [1]. Puerto Ricans and African  
122 Americans, the populations with the highest asthma prevalence and death rate, also  
123 have the lowest albuterol bronchodilator drug response (BDR). We conducted the  
124 largest pharmacogenetic study using whole genome sequencing data from 1,441  
125 minority children with asthma who had extremely high or low albuterol  
126 bronchodilator drug response. We identified population-specific and shared  
127 pharmacogenetic variants associated with BDR. Our findings help inform the  
128 direction of future development of asthma medications and our study advances the  
129 foundation of precision medicine for at-risk, yet understudied, racially/ethnically  
130 diverse populations.



## 131 INTRODUCTION

132 Asthma is a chronic inflammatory disorder of the airways characterized by  
133 recurrent respiratory symptoms and reversible airway obstruction. Asthma affects  
134 5% of the world population [2] and is the most common chronic disease among  
135 children [3, 4]. In the United States (U.S.), asthma is the most racially disparate  
136 health condition among common diseases [5, 6]. Specifically, U.S. asthma prevalence  
137 is highest among Puerto Ricans (36.5%), intermediate among African Americans  
138 (13.0%) and European Americans (12.1%), and lowest among Mexican Americans  
139 (7.5%) [7]. These disparities also extend to asthma mortality, which is four- to five-  
140 fold higher in Puerto Ricans and African Americans compared to Whites and  
141 Mexican Americans [1].

142 Current asthma guidelines recommend inhaled  $\beta_2$ -agonists (e.g., albuterol) for  
143 treatment of acute asthma symptoms. Albuterol is a short-acting  $\beta_2$ -adrenergic  
144 receptor ( $\beta_2$ AR) agonist, and it produces bronchodilation by causing rapid smooth  
145 muscle relaxation in the airways. Albuterol is the most commonly prescribed asthma  
146 medication in the world and is the mainstay of acute asthma management across all  
147 ethnic groups [8, 9]. Among low income and minority populations in the U.S.,  
148 albuterol is often the only medication used for asthma regardless of asthma severity  
149 [10, 11]. Response to albuterol is quantified based on bronchodilator drug response  
150 (BDR) using spirometry. We and others have demonstrated that there is significant  
151 variability in BDR among individuals and between populations [12, 13]. Specifically,  
152 the populations with the highest asthma prevalence and mortality also have the

153 lowest drug response to albuterol: Puerto Rican and African American children have  
154 significantly lower BDR than Whites and Mexican American children [13, 14]. This  
155 variation in drug response across racial/ethnic groups may contribute to the  
156 observed disparities in asthma morbidity and mortality [15-19].

157 BDR is a complex trait, influenced by environmental and genetic factors, with  
158 heritability estimates ranging from 47% to 92% [20-22]. Genome-wide association  
159 studies (GWAS) have identified several common single nucleotide polymorphisms  
160 (SNPs) associated with BDR in populations of European descent [23-25]. To date,  
161 only one GWAS of BDR has been conducted among African Americans [26]. While  
162 that study identified a novel BDR-associated locus, it did not replicate known  
163 associations discovered in populations of European descent, suggesting that BDR  
164 may be determined in part by population-specific variants. Our previous study of  
165 genetic predictors of BDR in Latino populations identified a significant contribution  
166 of population-specific rare variants to BDR [27].

167 GWAS were designed to identify common variants associated with disease  
168 through the use of genotyping arrays that relied on linkage disequilibrium to  
169 tag/represent variants not explicitly genotyped on the array itself. Early GWAS  
170 arrays were optimized for performance in populations of European origin and  
171 lacked the ability to capture race-/ethnic-specific genetic variation due to  
172 differences in linkage disequilibrium (LD) across racially/ethnically diverse  
173 populations [28]. Recent generations of arrays have attempted to tailor genotyping  
174 panels for major HapMap populations (Affymetrix Axiom® World Arrays [29]), or to

175 include population-specific and trans-ethnic tag SNPs to statistically infer genotypes  
176 not directly captured in diverse populations (Illumina Infinium® Multi-Ethnic  
177 Genotyping Array [30]). However, imputation accuracy decreases significantly with  
178 variant frequency [31, 32], making it difficult to use genotyping arrays to study rare  
179 and/or population-specific variants.

180 The most striking weakness of GWAS is the inability to adequately capture rare  
181 variation. Whole exome sequencing (WES) and other forms of targeted sequencing  
182 were developed to address the inability of genotyping arrays to capture rare  
183 variation. WES only allows for the capture of common and rare variants within  
184 coding and flanking regions. Studies have shown that a large number of variants  
185 associated with complex disease lie within non-coding regions of the genome  
186 (reviewed in Zhang and Lupski, 2015 [33]). Additionally, the target capture  
187 procedures result in uneven sequence coverage, limiting the reliability of SNP  
188 calling for loci close to the boundary of targeted regions. WES also has limited usage  
189 for the detection of structural variation, which depends heavily on uniform coverage  
190 across the genome.

191 Whole genome sequencing (WGS) is the ideal technology for identifying disease-  
192 causing variants that are rare and/or population-specific. Unlike GWAS genotyping  
193 arrays or targeted sequencing technologies, WGS allows the detection of common  
194 and rare variants in coding and non-coding regions. WGS is the only technology  
195 capable of a truly comprehensive and agnostic evaluation of genetic sequence  
196 variation in the context of complex disease. The persistent lack of large-scale genetic

197 studies conducted in populations of non-European descent further exacerbates  
198 racial/ethnic disparities in clinical and biomedical research [34-36]. The application  
199 of WGS to the evaluation of genetic factors within a racially/ethnically diverse study  
200 population is a necessary step toward eliminating health disparities in BDR and  
201 other complex phenotypes.

202 In this study, we performed WGS on 1,441 minority children with asthma from  
203 the tails of the BDR distribution (**S1 Fig**). Our study included high and low drug  
204 responders from three ethnic groups: Puerto Ricans (PR) (n=483), Mexicans (MX)  
205 (n=483), and African Americans (AF) (n=475). An overview of the subject selection  
206 process and main analyses performed in this study is presented in **Fig 1**. We  
207 identified multiple BDR-associated common and rare variants that are population-  
208 specific or shared among populations. This study is part of the National Heart, Lung,  
209 and Blood Institute's Trans-Omics for Precision Medicine Whole Genome  
210 Sequencing (TOPMed) program and represents the largest WGS study thus far to  
211 investigate genetic variants important for bronchodilator drug response in racially  
212 and ethnically diverse children with asthma.

213

## 214 **RESULTS**

### 215 **Descriptive characteristics of study subjects**

216 Descriptive characteristics for all study subjects (N=1,441, including 483 Puerto  
217 Ricans, 483 Mexicans and 475 African Americans) are summarized in **Table 1**.  
218 Covariates and demographic variables were assessed for significant differences  
219 between high and low drug responders for each racial/ethnic group. Significant  
220 differences were found for age (Mexicans,  $p < 0.001$ ), baseline lung function (pre-  
221 FEV<sub>1</sub> % predicted,  $p < 0.001$ ), total Immunoglobulin E (tIgE,  $p < 0.001$ ), and atopy.  
222 Baseline lung function (pre-FEV<sub>1</sub> % predicted) was defined as the percentage of  
223 observed FEV<sub>1</sub> relative to the expected population average FEV<sub>1</sub> estimated using the  
224 Hankinson lung function prediction equations [37].

225 **Table 1.** Study Population Description (N=1,441).

| Descriptive Statistics              |           | Puerto Ricans (N=483)  |                       |        | Mexicans (N=483)      |                       |        | African Americans (N=475) |                       |        |
|-------------------------------------|-----------|------------------------|-----------------------|--------|-----------------------|-----------------------|--------|---------------------------|-----------------------|--------|
|                                     |           | High BDR               | Low BDR               | P      | High BDR              | Low BDR               | P      | High BDR                  | Low BDR               | P      |
| Number of Subjects                  |           | 239                    | 244                   | -      | 243                   | 240                   | -      | 233                       | 242                   | -      |
| Percent Male                        |           | 53.6%                  | 53.3%                 | 1.0    | 60.1%                 | 52.1%                 | 0.08   | 55.4%                     | 47.9%                 | 0.12   |
| Median Age, yr (IQR)                |           | 11.6<br>(9.7 - 14.8)   | 12.2<br>(10.1 - 15.2) | 0.18   | 11.7<br>(9.6 - 14.0)  | 13.3<br>(10.6 - 16.0) | <0.001 | 13.8<br>(11.0 - 16.8)     | 13.8<br>(10.9 - 17.1) | 0.48   |
| Mean Global Ancestry Proportions    | AFR       | 0.24                   | 0.22                  | 0.44   | 0.05                  | 0.05                  | 0.37   | 0.79                      | 0.79                  | 0.80   |
|                                     | EUR       | 0.63                   | 0.64                  | 0.27   | 0.37                  | 0.36                  | 0.84   | 0.19                      | 0.20                  | 0.70   |
|                                     | NAM       | 0.13                   | 0.13                  | 0.93   | 0.58                  | 0.59                  | 0.90   | 0.02                      | 0.02                  | 0.90   |
| BMI Category, N                     | Obese     | 76                     | 67                    | 0.32   | 100                   | 96                    | 0.85   | 82                        | 83                    | 0.85   |
|                                     | Non-Obese | 163                    | 177                   |        | 143                   | 144                   |        | 151                       | 159                   |        |
| Pre-FEV <sub>1</sub> % Predicted, N | < 80%     | 149                    | 56                    | <0.001 | 43                    | 7                     | <0.001 | 47                        | 6                     | <0.001 |
|                                     | ≥ 80%     | 90                     | 188                   |        | 200                   | 233                   |        | 186                       | 236                   |        |
| Median ΔFEV <sub>1</sub> , % (IQR)  |           | 21.2<br>(18.2 - 25.7)  | 5.0<br>(2.9 - 6.3)    | -      | 12.7<br>(10.3 - 16.8) | 3.6<br>(2.0 - 4.9)    | -      | 15.5<br>(13.3 - 20.3)     | 3.3<br>(2.0 - 4.4)    | -      |
| Median tIgE, mL (IQR)               |           | 407.5<br>(126.8-952.8) | 191.9<br>(50.5-542.2) | <0.001 | 247.5<br>(64.2-817.0) | 105.7<br>(35.4-332.0) | <0.001 | 281.6<br>(97.3-552.4)     | 128.8<br>(36.6-351.3) | <0.001 |
| Atopy, N                            |           | 177                    | 118                   | <0.001 | 155                   | 117                   | <0.001 | 139                       | 111                   | <0.001 |

226  
 227 **BDR:** bronchodilator drug response. IQR: interquartile range. **Pre-FEV<sub>1</sub> % predicted:** percentage of measured FEV<sub>1</sub> relative to predicted FEV<sub>1</sub>  
 228 estimated by the Hankinson lung function prediction equations prior to administration to albuterol. **ΔFEV<sub>1</sub>:** a quantitative measure of BDR,  
 229 measured as the percent change in baseline FEV<sub>1</sub> after administration of albuterol. High and low drug responders were chosen from the  
 230 extremes of the BDR (ΔFEV<sub>1</sub>) distribution. **tIgE:** measure of total Immunoglobulin E from serum in milliliters. **Atopy:** tIgE measurement greater  
 231 than or equal to 100.

232 We estimated genetic ancestry for all participants (see **Methods**) and found that  
233 the major ancestry proportions in Puerto Ricans, Mexicans and African Americans  
234 are European, Native American and African ancestries, respectively (**Table 1, S2**  
235 **Fig**). Analysis of genetic substructure of the three admixed populations by principal  
236 component analysis (PCA) demonstrated that the three populations displayed the  
237 characteristic spectrum of ancestry found in admixed populations (**S3 Fig**).

### 238 **Variant summary statistics**

239 Genetic variant summary statistics revealed that the average number of variants by  
240 population corresponded to the proportion of African ancestry: the most variants  
241 were found among African Americans, followed by Puerto Ricans and Mexicans (**Fig**  
242 **2a, Table 2**).

243 **Table 2.** Summary statistics of variants

|                                                 | Puerto Ricans                  | Mexicans                       | African Americans              |
|-------------------------------------------------|--------------------------------|--------------------------------|--------------------------------|
| <b>Range in variants, per individual (mean)</b> |                                |                                |                                |
| <b>All</b>                                      | 3.7M – 4.4 M<br>(4.0 M)        | 3.5M – 4.1M<br>(3.7M)          | 4.0M – 4.5M<br>(4.3M)          |
| SNPs                                            | 3.4M – 4.0 M<br>(3.6M)         | 3.2M - 3.7M<br>(3.4M)          | 3.6M – 4.1M<br>(4.0M)          |
| Indels                                          | 284,067 – 344,493<br>(305,618) | 272,635 – 321,778<br>(289,096) | 311,997 – 354,646<br>(339,570) |
| Others*                                         | 21,233 – 29,177<br>(24,728)    | 19,703 – 26,772<br>(23,190)    | 22,014 – 30,993<br>(27,911)    |
| <b>No. of biallelic SNPs, union**</b>           | 29.2M                          | 28.1M                          | 36.3M                          |
| <b>By allele frequency of data</b>              |                                |                                |                                |
| Rare (< 1%)                                     | 18,169,292 (62%)               | 20,029,291 (71%)               | 22,847,938 (63%)               |
| Common (≥ 1%)                                   | 11,007,125 (38%)               | 8,092,157 (29%)                | 13,459,004 (37%)               |
| <b>Population-specific***</b>                   |                                |                                |                                |
| Singleton                                       | 6,680,909                      | 9,687,651                      | 14,114,142                     |
| < 5%                                            | 4,616,383 (69%)                | 7,983,950 (82%)                | 10,574,879 (75%)               |
| < 5%                                            | 6,676,286 (> 99%)              | 9,675,271 (> 99%)              | 14,096,844 (> 99%)             |
| ≥ 5%                                            | 4,623 (< 1%)                   | 12,380 (< 1%)                  | 17,298 (< 1%)                  |
| <b>By novelty (dbSNP150)</b>                    |                                |                                |                                |
| Known                                           | 27,034,179 (93%)               | 25,911,801 (92%)               | 33,540,387 (92%)               |
| Novel                                           | 2,142,238 (7%)                 | 2,209,647 (8%)                 | 2,766,555 (8%)                 |
| <b>By protein impact****</b>                    |                                |                                |                                |
| Coding                                          | 284,269 (1%)                   | 289,055 (1%)                   | 362,823 (1%)                   |
| <i>Nonsynonymous</i>                            | 157,541                        | 164,312                        | 203,029                        |
| <i>Stopgain / stoploss</i>                      | 3,194                          | 3,531                          | 4,158                          |
| <i>Splicing</i>                                 | 2,111                          | 2,214                          | 2,620                          |
| <i>Other coding</i>                             | 121,423                        | 118,998                        | 153,016                        |
| Noncoding                                       | 28,833,461 (99%)               | 27,769,434 (99%)               | 35,878,723 (99%)               |
| Not annotated <sup>^</sup>                      | 58,687 (< 1%)                  | 62,959 (< 1%)                  | 65,396 (< 1%)                  |

244 \* Includes multi-nucleotide polymorphism (MNPs), complex, symbolic and mixed variants as  
245 defined by GATK VariantEval.

246 \*\* Biallelic SNPs with less than 10% genotype missingness per population were included.

247 \*\*\* Biallelic SNPs that are present in only one of the three studied populations.

248 \*\*\*\* Other coding variants include those annotated as exonic and synonymous in ANNOVAR.

249 <sup>^</sup> Not annotated: biallelic SNPs not included in the annotation pipeline because they are not  
250 present in TOPMed freeze 2 and 3 data releases.



251 The majority of observed variants (>90%) were SNPs. The union of biallelic SNPs  
252 from all individuals in each population varied from 28.1M among Mexicans, 29.2M  
253 among Puerto Ricans to 36.3M among African Americans. Approximately 65% of  
254 biallelic SNPs were rare (non-reference allele frequency < 1%, **Fig 2b, Table 2**).  
255 Biallelic SNPs that were population-specific (i.e., SNPs found in only one population)  
256 accounted for 23% (6.68M / 29.2M in Puerto Ricans) to 39% (14.1M / 36.3M in  
257 African Americans) of the biallelic SNPs observed in each population. Over 99% of  
258 the population-specific SNPs had a non-reference allele frequency less than 5% and  
259 the majority of these population-specific SNPs (69% to 82%) were also singletons  
260 (**Fig 2c, Table 2**). Based on dbSNP build 150, an average of 8% of biallelic SNPs  
261 were novel (**Fig 2d, Table 2**).

262 In all three populations, 99% of the biallelic SNPs were observed in noncoding  
263 regions. Based on the Combined Annotation Dependent Depletion (CADD) score  
264 [38], which estimates the deleteriousness of a variant, over 99% of highly  
265 deleterious biallelic SNPs (CADD score  $\geq$  25) were observed in coding regions,  
266 regardless of ethnicity (**Table 3**). This may be due to the relatively limited  
267 availability of functional annotations as positive training data for CADD to estimate  
268 deleteriousness in non-coding regions [39]. The percentage of singletons in these  
269 highly deleterious biallelic SNPs varied from 51% (Puerto Ricans) to 70%  
270 (Mexicans).

271 **Table 3.** CADD score summary statistics of biallelic SNPs\*.

| Population        | CADD score | No. of SNPs* | % Coding | % Singletons |
|-------------------|------------|--------------|----------|--------------|
| Puerto Ricans     | 0-9        | 26,936,285   | 0.5%     | 29%          |
|                   | 10-19      | 2,027,392    | 4%       | 32%          |
|                   | 20-24      | 123,481      | 32%      | 37%          |
|                   | ≥ 25       | 30,572       | >99%     | 51%          |
| Mexicans          | 0-9        | 25,932,006   | 0.5%     | 44%          |
|                   | 10-19      | 1,967,096    | 4%       | 49%          |
|                   | 20-24      | 124,173      | 34%      | 55%          |
|                   | ≥ 25       | 35,214       | >99%     | 70%          |
| African Americans | 0-9        | 33,468,245   | 0.5%     | 36%          |
|                   | 10-19      | 2,573,523    | 4%       | 40%          |
|                   | 20-24      | 158,967      | 32%      | 46%          |
|                   | ≥ 25       | 40,811       | >99%     | 64%          |

272 \*Biallelic SNPs with less than 10% genotype missingness per population were included.

273

### 274 **BDR association testing with common variants**

275 We performed genome-wide association testing of common variants with BDR  
 276 (dichotomized as high/low drug responders from the extremes of the BDR  
 277 distribution) for each population, adjusting by age, sex, body mass index (BMI)  
 278 categories, and the first ten principal components (PCs) (see **Methods** section  
 279 “Single locus BDR association testing on common variants” for rationale on  
 280 including these covariates). We then performed a trans-ethnic meta-analysis on  
 281 these results across all three populations. For all three populations, 94% of all  
 282 common variants tested are known variants annotated in dbSNP Build 150 (**S1**  
 283 **Table**).

284 A universal  $p$ -value threshold of  $5 \times 10^{-8}$  is often used to determine significance in  
285 GWAS. This statistical threshold was calculated based on Bonferroni correction  
286 under the assumption of 1,000,000 independent tests using patterns of linkage  
287 disequilibrium based primarily on individuals of European descent and has been  
288 shown to be non-generalizable for WGS studies or genetic studies of non-European  
289 populations in general [40-42]. The number of independent tests varies by LD  
290 patterns, which in turn vary by race/ethnicity [41]. We calculated the effective  
291 number of independent tests for each population and for our trans-ethnic meta-  
292 analysis, and generated racially/ethnically adjusted genome-wide significance  
293 thresholds for each population (see **Methods**). Population-specific genome-wide  
294 significance thresholds after correcting for the number of effective tests (adjusted  
295 genome-wide significance level) were  $1.57 \times 10^{-7}$  for Puerto Ricans,  $2.42 \times 10^{-7}$  for  
296 Mexicans, and  $9.59 \times 10^{-8}$  for African Americans (see **Methods**). These numbers are  
297 highly concordant with WGS significance thresholds derived from the African  
298 American (ASW), Mexican (MXL), and Puerto Rican (PUR) 1000 Genomes  
299 sequencing data [41]. The adjusted genome-wide significance level for our trans-  
300 ethnic meta-analysis was  $3.53 \times 10^{-7}$ . Significance thresholds for discovery analyses  
301 in genome-wide association studies can often produce false negative results [43-46].  
302 To minimize Type II error, suggestive associations are often included in replication  
303 and functional validation studies. We identified suggestive associations based on the  
304 following widely used formula:  $1/(\text{effective number of tests})$  [43-46].

305 While no significant associations were identified from the population-specific  
306 analyses (**S8 Fig**), our trans-ethnic meta-analysis identified ten unique loci

307 (represented by 27 SNPs) significantly ( $p < 3.53 \times 10^{-7}$ ) or suggestively ( $p < 7.06 \times$   
308  $10^{-6}$ ) associated with BDR status (**Fig 3a, Table 4, S2 Table**). We annotated all 27  
309 SNPs by performing a thorough bioinformatics search in ENCODE, NHGRI-EBL  
310 GWAS Catalog and PubMed databases. Their previously reported lung-related  
311 phenotype associations and functional annotations are reported in **S4 Table** and **S9**  
312 **Table**.

313 Two SNPs, rs17834628 and rs35661809, located on chromosome 5 were  
314 significantly associated with BDR ( $p = 1.18 \times 10^{-8}$  and  $3.33 \times 10^{-8}$ ); additionally,  
315 population-specific analyses show that the direction of effect for these two variants  
316 is concordant across all three populations (**Fig 3b, S3 Table**). **Fig 3c** displays a  
317 LocusZoom plot of rs17834628 with 400 kb flanking regions. Three of the 27  
318 identified SNPs were located within genes. Specifically, two SNPs are located in the  
319 third and fifth introns of *NFKB1* (rs28450894 and rs4648006), and a third SNP,  
320 rs16995064, mapped to intron 7 of *PLCB1* (**Table 4**). Among the *NFKB1* SNPs, the  
321 low BDR-associated T allele of rs28450894 is found predominantly among African  
322 populations (minor allele frequency [MAF] 8.8% – 28.7%), followed by European  
323 populations (MAF 3.7% - 7.6%) and Puerto Ricans (MAF 6.2%), and is relatively  
324 rare in Mexicans (MAF 1.5%) based on 1000 Genomes data (**S6 Fig**). Combined,  
325 these 27 SNPs explain 23%, 16%, and 18% of the variation in BDR status in Puerto  
326 Ricans, Mexicans, and African Americans, respectively (**S5 Table**).

7 **Table 4.** Results from trans-ethnic BDR association tests for common variants.

| Chr | Start     | rsID       | Effect allele | OR (95%CI)       | p         | Effect allele frequency |      |      | Nearest genes                                                     |
|-----|-----------|------------|---------------|------------------|-----------|-------------------------|------|------|-------------------------------------------------------------------|
|     |           |            |               |                  |           | PR                      | MX   | AA   |                                                                   |
| 5   | 12978566  | rs17834628 | A             | 1.67 (1.29-2.16) | 1.18E-08* | 0.32                    | 0.42 | 0.17 | LINC01194 (-173k), MIR4454 (-311k), CTNND2 (-1074k), DNAH5 (712k) |
| 5   | 12968341  | rs35661809 | G             | 1.59 (1.20-2.10) | 3.33E-08* | 0.34                    | 0.43 | 0.24 | LINC01194 (-163k), MIR4454 (-300k), CTNND2 (-1064k), DNAH5 (722k) |
| 5   | 12975934  | rs17237639 | G             | 1.61 (1.30-2.00) | 1.22E-07  | 0.31                    | 0.43 | 0.16 | LINC01194 (-171k), MIR4454 (-308k), CTNND2 (-1072k), DNAH5 (715k) |
| 5   | 12975187  | rs1017452  | G             | 1.60 (1.31-1.96) | 2.11E-07  | 0.31                    | 0.43 | 0.16 | LINC01194 (-170k), MIR4454 (-307k), CTNND2 (-1071k), DNAH5 (715k) |
| 5   | 12975322  | rs1017454  | A             | 1.60 (1.31-1.96) | 2.11E-07  | 0.31                    | 0.43 | 0.16 | LINC01194 (-170k), MIR4454 (-307k), CTNND2 (-1071k), DNAH5 (715k) |
| 5   | 12975265  | rs1017453  | C             | 1.56 (1.25-1.95) | 6.40E-07  | 0.31                    | 0.42 | 0.16 | LINC01194 (-170k), MIR4454 (-307k), CTNND2 (-1071k), DNAH5 (715k) |
| 5   | 12972636  | rs17237443 | C             | 1.59 (1.28-1.97) | 9.85E-07  | 0.29                    | 0.42 | 0.11 | LINC01194 (-170k), MIR4454 (-307k), CTNND2 (-1071k), DNAH5 (715k) |
| 1   | 209324294 | rs10746419 | T             | 1.29 (0.75-2.25) | 1.19E-06  | 0.49                    | 0.54 | 0.53 | MIR205HG (278k), MIR205 (281k), CAMK1G (433k), LAMB3 (464k)       |
| 5   | 12961545  | rs17833938 | A             | 1.56 (1.28-1.91) | 1.45E-06  | 0.30                    | 0.42 | 0.12 | LINC01194 (-156k), MIR4454 (-294k), CTNND2 (-1057k), DNAH5 (729k) |
| 6   | 104240500 | rs13437006 | C             | 1.56 (1.21-2.02) | 1.61E-06  | 0.22                    | 0.24 | 0.32 | HACE1 (935k), LINC00577 (1144k), LIN28B (1164k)                   |
| 15  | 101230457 | rs1565749  | A             | 1.66 (1.18-2.32) | 1.64E-06  | 0.18                    | 0.15 | 0.18 | ASB7 (-39k), LINS1 (-88k), PRKXP1 (-131k)                         |
| 5   | 12948369  | rs34845041 | T             | 1.56 (1.26-1.92) | 1.77E-06  | 0.30                    | 0.42 | 0.12 | LINC01194 (-143k), MIR4454 (-280k), CTNND2 (-1044k), DNAH5 (742k) |
| 5   | 12975108  | rs1017451  | T             | 1.55 (1.24-1.93) | 1.96E-06  | 0.30                    | 0.42 | 0.13 | LINC01194 (-170k), MIR4454 (-307k), CTNND2 (-1071k), DNAH5 (715k) |
| 5   | 12950432  | rs62347395 | G             | 1.55 (1.26-1.92) | 2.02E-06  | 0.30                    | 0.42 | 0.12 | LINC01194 (-145k), MIR4454 (-282k), CTNND2 (-1046k), DNAH5 (740k) |
| 15  | 101231049 | rs57924834 | A             | 1.59 (1.25-2.03) | 2.04E-06  | 0.23                    | 0.20 | 0.20 | ASB7 (-39k), LINS1 (-89k), PRKXP1 (-132k)                         |
| 4   | 137382142 | rs17048684 | A             | 1.8 (1.06-3.05)  | 2.20E-06  | 0.11                    | 0.14 | 0.18 | LINC00613 (-547k), PCDH18 (1058k)                                 |
| 5   | 12959598  | rs1438293  | G             | 1.55 (1.24-1.93) | 2.73E-06  | 0.29                    | 0.42 | 0.11 | LINC01194 (-154k), MIR4454 (-292k), CTNND2 (-1055k), DNAH5 (731k) |
| 20  | 8635168   | rs16995064 | G             | 1.96 (1.12-3.43) | 3.30E-06  | 0.12                    | 0.13 | 0.05 | <b>PLCB1 (intron 7)</b> , PLCB4 (415k)                            |
| 12  | 19821401  | rs66544720 | T             | 0.66 (0.55-0.78) | 3.66E-06  | 0.33                    | 0.37 | 0.16 | AEBP2 (-146k), PLEKHA5 (-292k)                                    |
| 6   | 104235591 | rs6926020  | C             | 1.57 (1.25-1.97) | 3.68E-06  | 0.19                    | 0.23 | 0.27 | HACE1 (940k), LINC00577 (1149k), LIN28B (1169k)                   |
| 4   | 103453535 | rs28450894 | T             | 0.47 (0.34-0.64) | 3.75E-06  | 0.06                    | 0.03 | 0.12 | SLC39A8 (-187k), <b>NFKB1 (intron 3)</b> , MANBA (99k)            |
| 4   | 103461559 | rs4648006  | T             | 0.47 (0.34-0.64) | 3.75E-06  | 0.06                    | 0.03 | 0.12 | SLC39A8 (-195k), <b>NFKB1 (intron 5)</b> , MANBA (91k)            |
| 22  | 27826429  | rs60163793 | G             | 2.01 (1.20-3.38) | 4.30E-06  | 0.04                    | 0.14 | 0.15 | MN1 (318k), PITPNB (421k)                                         |
| 12  | 19824386  | rs7313907  | C             | 0.66 (0.55-0.79) | 4.35E-06  | 0.33                    | 0.37 | 0.16 | AEBP2 (-149k), PLEKHA5 (-295k)                                    |
| 12  | 19820677  | rs11044754 | A             | 0.66 (0.55-0.79) | 4.54E-06  | 0.33                    | 0.37 | 0.16 | AEBP2 (-146k), PLEKHA5 (-291k)                                    |
| 15  | 101233236 | rs55638658 | A             | 1.61 (1.13-2.30) | 5.08E-06  | 0.18                    | 0.15 | 0.18 | ASB7 (-41k), LINS1 (-91k), PRKXP1 (-134k)                         |
| 6   | 54581204  | rs13200833 | A             | 0.66 (0.48-0.90) | 5.15E-06  | 0.32                    | 0.24 | 0.22 | TINAG (-326k), MLIP (-450k), FAM83B (130k)                        |

8 The top ten unique loci (represented by 27 SNPs) significantly ( $p < 3.53 \times 10^{-7}$ ) or suggestively ( $p < 7.06 \times 10^{-6}$ ) associated with BDR status in our trans-ethnic meta-analysis. **Chr and Start:**  
 9 chromosome locations of SNPs in GRCh37 coordinates. All significantly and suggestively associated common variants are presented above. **Nearest genes:** The four nearest transcripts from RefSeq  
 0 were identified and genes with multiple transcripts were reported once only with the distance to the nearest transcripts indicated in parentheses. Negative distances indicate upstream genes.  
 1 Genes that overlap with BDR-associated SNPs are bold. High drug responders were assigned as cases in analyses throughout this study.\* p-values that achieve adjusted genome-wide significance  
 2 for trans-ethnic meta-analysis ( $p < 3.53 \times 10^{-7}$ ).

333 It has been shown that functionally relevant variants do not always display the  
334 lowest *p*-values in association studies [47]. To avoid false negative results, it is  
335 strongly suggested that replication analyses for two-stage genome-wide studies [43-  
336 46]. Therefore, we included all 27 SNPs in replication analyses we performed  
337 separately and via meta-analysis in five independent populations (GALA I, SAGE I,  
338 HPR, SAPPHIRE and CHOP) (**S6-S7 Table**). None of the 27 SNPs were significantly  
339 associated with BDR status in our replication analyses (**S6-S7 Table**). It is  
340 important to note that our largest replication cohort (SAPPHIRE) did not include  
341 children (median age = 30 and 28 for high and low BDR groups, respectively, **S6**  
342 **Table**). All other replication populations included less than 500 individuals per  
343 study (**S6 Table**). It is well known that there are age-specific associations with  
344 asthma and asthma-related phenotypes [48, 49]. It is unclear whether the same is  
345 true for BDR. It is possible that the overrepresentation of adult patients in our  
346 available replication populations may explain, in part, our lack of replication.

347 In addition to performing WGS association analyses to identify genetic variants  
348 associated with variation in BDR, we also performed H3K27ac chromatin  
349 immunoprecipitation sequencing analysis (ChIP-seq) experiments in primary  
350 bronchial smooth muscle cells (BSMCs) to identify potential regulatory regions  
351 marked by H3K27ac peaks. Albuterol's mechanism of action involves binding with  
352 the  $\beta_2$ -adrenergic receptor in bronchial smooth muscle cells causing rapid onset of  
353 airway tissue relaxation and bronchodilation. BSMCs are therefore considered one  
354 of the most relevant cell types for molecular studies of BDR [50]. We observed two  
355 H3K27ac ChIP-seq signals that overlapped with variants in moderate to high LD ( $R^2$

356 = 0.47 to 0.82) with two *NFKB1* SNPs (rs28450894 and rs4648006) we identified  
357 through trans-ethnic meta-analysis, implying that these variants may have  
358 regulatory functions in BSMC (**S5 Fig a, S8 Table**).

359 The gold standard for identifying true signals in genetic association studies is to  
360 use *p*-values from a primary and/or replication study to prioritize variants for  
361 further investigation. The use of *p*-values as the sole metric for prioritization is  
362 problematic for three reasons: (1) the *p*-value statistic is dependent on sample size  
363 and effect magnitude, (2) *p*-values do not incorporate biological knowledge, and (3)  
364 one cannot use *p*-values to distinguish between true association signals and noise of  
365 the same magnitude [47, 51, 52]. Instead of relying solely on *p*-values, we applied  
366 the Diverse Convergent Evidence (DiCE) [53] approach to prioritize each of the 27  
367 BDR-associated SNPs from our trans-ethnic meta-analysis for inclusion in further  
368 function analyses (**S15 Table, S4 Fig**). After integrating information from our WGS  
369 analysis, publicly available bioinformatics data, and ChIP-Seq experiments in BSMCs,  
370 the *NFKB1* locus had the highest DiCE evidence score, indicating that this locus had  
371 the strongest evidence of functional relevance to BDR variation (**S4 Fig**). Therefore,  
372 all further functional experiments were focused on variants within this locus.

### 373 ***Functional assays on the NFKB1 Locus***

374 Both H3K27ac ChIP-seq regions that overlapped with the BDR-associated *NFKB1*  
375 locus were tested for enhancer activity using luciferase enhancer assays. The  
376 sequences of these two *NFKB1* intronic regions were cloned into a pGL4.23  
377 enhancer assay vector (Promega, Madison, WI, USA), which contains a minimal  
378 promoter and a luciferase reporter gene. The pGL4.23 vector with the viral SV40

379 promoter was used as a positive control, and the pGL4.23 empty vector as a  
380 negative control. All constructs were tested for their enhancer activity in BSMCs.  
381 One enhancer, *NFKB1* Region 2, showed significantly increased enhancer activity  
382 over empty vector (2.24-fold increase,  $p = 8.70 \times 10^{-6}$ , unpaired t-test; **S5 Fig b**).

383 Given the relevance of *NFKB1* in immune pathways and asthma, we also  
384 performed RNA sequencing (RNA-seq) experiments to verify whether the identified  
385 intronic *NFKB1* SNPs regulate gene expression of neighboring genes. Among genes  
386 within 1Mb of rs28450894 meeting expression reliability cutoffs (see **Methods**), we  
387 found that the low BDR-associated T allele of rs28450894 is significantly associated  
388 with decreased expression of *SLC39A8* in blood (**S7 Fig**,  $p = 0.0066$ , FDR-adjusted  $p$   
389 = 0.0856,  $\log_2(\beta) = -0.327$ ).

390 We observed that two known BDR candidate genes, *ADCY9* and *CRHR2*, which  
391 achieved replication in a previous GWAS of BDR performed in the full GALA II  
392 population but did not replicate in the current study (**S10 Table**) [27]. In the  
393 previous study, GWAS array data, supplemented by imputation, were used to  
394 evaluate genetic associations with BDR measured as a continuous trait. To  
395 determine whether the discrepancy between findings was due to data type  
396 (imputed array-based vs. WGS-based) or study design (continuous trait vs. extreme  
397 phenotype), the common variant analysis in the current analysis was repeated  
398 among the subset of samples that had array-based and WGS data ( $n = 1,414$  out of  
399 1,441). Based on the top 1,000 BDR-associated SNPs from the current common  
400 variant analysis, there was high correlation between association  $p$ -values generated  
401 from imputed array-based and WGS-based genotypes (Spearman correlation = 1.0),



402 suggesting that data type is not the cause of the observed discrepancy (**S9 Fig a**).

403 Nearly all SNPs with high imputation  $R^2$  exhibited high genotype concordance

404 between array-based and WGS-based genotypes, confirming high imputation quality

405 for most common SNPs ( $\geq 99.7\%$ ). (**S9 Fig b and c**). We also performed linear

406 regression to analyze BDR ( $\Delta FEV_1$ ) as a continuous trait using imputed array-based

407 data. The most significantly associated SNP identified in the trans-ethnic meta-

408 analysis using extreme phenotype analysis displayed the same direction of effect as

409 analyzing BDR as a continuous trait (OR=1.67 in extreme phenotype analysis and

410  $\beta=0.51$  in continuous analysis). These observations indicate that the discrepancy

411 between findings may be due to differences in statistical power afforded by the

412 different study designs (continuous trait vs. extreme phenotype). For common

413 variant analyses, dichotomization of a continuous outcome results in a loss of

414 statistical power [54-57]. For example, a population of 2,000 individuals has 80%

415 power to identify moderate genetic associations ( $\beta=0.3$ ) for common variants with

416 minor allele frequencies  $\geq 0.05$  when the outcome is continuous. If this population

417 were re-analyzed after dichotomizing the continuous outcome at the median

418 (cases=1,000, controls=1,000), power would be reduced to 62%. The opposite effect

419 is observed in rare variant analyses. The extreme phenotype study design is a

420 specific type of dichotomous outcome study design that has been shown to increase

421 power and the probability of identifying functional rare variants [56-58]. It should

422 also be noted that the previously published results were discovered in one

423 population (Puerto Ricans), whereas the results from our trans-ethnic meta-analysis

424 describe associations that are conserved across three populations (Puerto Ricans,  
425 Mexicans, and African Americans).

#### 426 **BDR association testing using common and rare variants**

427 We tested the combined effects of common and rare variants on BDR using SKAT-O  
428 [59] to examine variants in 1kb sliding windows, which moved across the genome in  
429 500bp increments. The same covariates used for common variant association  
430 testing were applied.

431 After identifying the effective number of tests and adjusting for multiple  
432 comparisons on each population separately (see **Methods**), we identified three  
433 population-specific loci associated with BDR at genome-wide significance levels;  
434 two were found in Mexicans on chromosome 1 and chromosome 11, and one in  
435 African Americans on chromosome 19 (**Fig 4a-c, Table 5, S11 Table**).

436 **Table 5.** Results from association testing on combined effects of common and rare variants on BDR

| Chr | Start     | Stop      | <i>p</i> | Population | nCommon | nRare | Nearest genes                                                                                |
|-----|-----------|-----------|----------|------------|---------|-------|----------------------------------------------------------------------------------------------|
| 1   | 114177000 | 114178000 | 4.40E-09 | MX         | 2       | 1     | <b>MAGI3 (intron 9)</b> , <i>PHTF1</i> (62k), <i>RSBN1</i> (126k)                            |
| 11  | 27507000  | 27508000  | 6.59E-09 | MX         | 2       | 3     | <i>LOC105376671</i> (-3k), <i>LGR4</i> (-13k), <i>LIN7C</i> (8k)                             |
| 19  | 10424000  | 10425000  | 3.12E-11 | AA         | 1       | 2     | <i>ZGLP1</i> (-4k), <i>ICAM5</i> (-17k), <b>FDX1L (intron 3)</b> , <i>RAVER1</i> (2k)        |
| 4   | 73478000  | 73479000  | 6.25E-08 | Combined   | 10      | 23    | <i>ADAMTS3</i> (-43k), <i>COX18</i> (441k)                                                   |
| 8   | 97926000  | 97927000  | 1.32E-08 | Combined   | 3       | 13    | <i>SDC2</i> (-302k), <b>CPQ (intron 4)</b> , <i>LOC101927066</i> (37k), <i>TSPYL5</i> (359k) |

437 **Chr, start and stop:** GRCh37 chromosome coordinates; **AA:** African Americans; **MX:** Mexicans; **Combined:** all individuals in all three populations. **nCommon**  
 438 **and nRare:** number of common and rare variants, respectively. **Nearest genes:** The four nearest transcripts from RefSeq were identified and genes with  
 439 multiple transcripts were reported once only with the distance to the nearest transcripts indicated in parentheses. Negative distances indicate upstream  
 440 genes. Genes that overlap with BDR-associated SNPs are bold.

441 We also performed association testing across all three populations in a single  
442 analysis. Pooling subjects increased the sample size and thereby maximized the  
443 power of the SKAT-O association test. To minimize any potential effect of  
444 confounding by population substructure, association testing also included local  
445 genetic ancestry, defined as the proportions of Native American and African  
446 ancestries for the window under testing. Two loci on chromosomes 4 and 8 were  
447 found to be genome-wide significant ( $p < 1.53 \times 10^{-7}$ ) (**Fig 4d, Table 5**). A total of 60  
448 variants were identified from all SKAT-O regions reported in **Table 5**. Six of the 60  
449 variants were located within predicted regulatory regions (**S12 Table**). Specifically,  
450 three variants located on chromosome 11 identified in Mexicans overlap with a  
451 CTCF (transcriptional repressor) binding site and comprise a chromatin insulator  
452 region. The five regions identified in our combined and population- specific SKAT-O  
453 analyses independently explained 4% to 8% of the variation in BDR in their  
454 respective populations (**Table 5, S5 Table**).

455 We examined alternative grouping strategies for rare variants, including  
456 grouping by (1) genes from transcription start to end sites with or without 50kb  
457 flanking regions, (2) transcription start site with 20kb flanking regions, and (3)  
458 H3K27ac ChIP-seq peaks in airway epithelial cells and airway smooth muscle cells.  
459 Association tests with these alternate grouping strategies identified no further  
460 significant associations.

## 461 **DISCUSSION**

462 We identified population-specific and shared common and rare variants associated  
463 with bronchodilator drug response in three ethnically diverse populations of  
464 children with asthma. WGS, unlike GWAS genotyping arrays and targeted  
465 sequencing, provides comprehensive detection of common and rare variants in  
466 coding and non-coding regions. African Americans, Latinos, and other minorities  
467 have been dramatically underrepresented in GWAS [34-36]. Combined, the 27  
468 variants identified from our common variant analyses (**Table 4**) explained 23%,  
469 16%, and 18% of the variation in BDR in Puerto Ricans, Mexicans, and African  
470 Americans, respectively, after adjusting for clinical covariates (**S5 Table**). The five  
471 SKAT-O regions identified in our combined and population-specific analyses  
472 independently explained 4% to 8% of the BDR variation in their respective  
473 populations (**Table 5, S5 Table**). Our study represents an important investment  
474 from the NIH/NHLBI to include underrepresented populations in large whole  
475 genome sequencing efforts and to improve racial/ethnic diversity in clinical and  
476 biomedical research.

477 Our trans-ethnic common variants meta-analysis identified one locus on  
478 chromosome 5 that was associated with BDR at a genome-wide significance level ( $p$   
479  $< 5 \times 10^{-8}$ ). The proximity of this BDR-associated locus to *DNAH5* and *LINC01194* is  
480 of particular interest. A SNP in *DNAH5* has been associated with total lung capacity  
481 in White subjects with chronic obstructive pulmonary disease [60]. In a separate  
482 GWAS, the *DNAH5/LINC01194* locus was reported among Europeans to be  
483 associated with levels of IgE [61, 62], a biomarker associated with asthma  
484 endotypes. Baseline lung function ( $FEV_1$ ) and total IgE levels are associated with

485 asthma severity and can predispose an individual to lower bronchodilator drug  
486 responsiveness [13, 14, 63]. We found two *NFKB1* intronic variants on chromosome  
487 4 associated with BDR at a suggestive significance level. The NFκB protein has a  
488 known role in allergic response, and various studies have demonstrated that the  
489 NFκB pathway is activated in patients with asthma, as reviewed by Edwards *et al.*  
490 [64].

491       ChIP-seq and functional enhancer assays in BSMCs suggest these *NFKB1* intronic  
492 variants may regulate expression of nearby genes. This was in fact supported by our  
493 RNA-seq data, which showed that individuals with the low BDR-associated T allele  
494 genotype displayed reduced expression of the neighboring gene *SLC39A8*, which has  
495 previously been found to be responsive to cytokine treatment in airway epithelial  
496 cells [65] and had reduced expression in mice with allergic airway inflammation  
497 [66]. Recent studies have also shown that *SLC39A8* is unique among zinc  
498 transporters in that upregulation of *SLC39A8* is sufficient to protect lung epithelium  
499 against TNF-α-induced cytotoxicity [67]. Additionally, the higher frequency of the  
500 low BDR-associated allele (T allele of rs28450894 in *NFKB1*) in African populations  
501 suggests that the low BDR-associated allele tracks with African ancestry. This may  
502 explain why admixed populations with higher proportions of African ancestry, i.e.,  
503 African Americans and Puerto Ricans, have lower bronchodilator drug  
504 responsiveness [14], and by extension may shed light on the higher asthma  
505 morbidity and mortality in these populations.

506       Another intronic variant (chromosome 20, rs16995064, *PLCB1* intron 7) was  
507 associated with BDR at a suggestive significance level. *PLCB1* is highly relevant, as

508 this gene has been reported to be differentially expressed in therapy-resistant  
509 childhood asthma compared to controlled persistent asthma or age-matched  
510 healthy control subjects in a Swedish cohort [68]. Functional studies also reported  
511 that silencing *PLCB1* inhibited the effect of lipopolysaccharide-induced endothelial  
512 cell inflammation through inhibiting expression of proinflammatory cytokines [69].  
513 Further functional studies are necessary to establish the role of *NFKB1* and *PLCB1*  
514 on BDR.

515       Apart from assessing the individual effect of common variants on BDR, we also  
516 identified various combined effects of rare variants that were population-specific or  
517 shared across populations. While some of the nearest genes are uncharacterized or  
518 have no known functional relationship to BDR (*MAGI3*, *LOC105376671*, *LIN7C* and  
519 *CPQ*), there appears to be functional relevance for the locus between *ADAMTS3* and  
520 *COX18*. The *ADAMTS3* and *COX18* locus were associated with  $\beta$ -adrenergic responses  
521 in cardiovascular-related traits in mice [70]. This locus was significantly associated  
522 with cardiac atrial weight in mice treated with the  $\beta$  blocker atenolol; the  
523 association also replicated in mice treated with the  $\beta$  agonist isoproterenol. These  
524 findings suggest that SNPs found in this locus may modify  $\beta$  adrenergic signaling  
525 pathways in BDR. In the present study, we also identified BDR association with rare  
526 variants within the *CPQ* gene, which encodes a protein from the carboxypeptidase  
527 family. Although no previous BDR association has been identified for *CPQ*, another  
528 member of the carboxypeptidase family, carboxypeptidase A3 (CPA3), is known to  
529 be expressed at higher levels in the airway epithelium among subjects with T<sub>H</sub>2-

530 high asthma [71, 72]. Further studies are necessary to determine the role of *CPQ* in  
531 BDR.

532 GWAS-based BDR-associated common variants in GALA II have previously been  
533 reported [27]. However, these variants did not replicate in the current study, likely  
534 due to different study designs between the previous and current investigations. The  
535 previous BDR GWAS used an array-based genotyping panel to examine children  
536 with asthma across the entire BDR spectrum, i.e., BDR was used as a continuous  
537 variable. In contrast, the current study sequenced the entire genome to investigate  
538 only the extremes of the BDR distribution (i.e., high and low drug responders). By  
539 repeating our current analysis using a subset of individuals who had array and WGS  
540 data, we confirmed that the major discrepancy between the two studies is due to  
541 study design instead of differences in data type. The contrast in results between  
542 GWAS and WGS due to differences in study design implies that varied study designs  
543 are necessary for a comprehensive understanding of variants associated with  
544 asthma-related phenotypes and drug response. Studying samples from the extreme  
545 tails of drug response distribution has been recognized as one of the success factors  
546 in the study design of pharmacogenomic GWAS [73]. Furthermore, it was recently  
547 demonstrated that the power gain from studying extreme phenotypes is much  
548 greater in analyses of rare variants compared to common variant studies [55]. Since  
549 cost is often a limiting factor for WGS studies, choosing an extreme phenotypic study  
550 design may be beneficial for the study of rare variants and the discovery of common  
551 variant associations that may otherwise be missed when sampling across the entire  
552 phenotypic spectrum.



553 We did not identify BDR-associated variants from  $\beta_2$ AR signaling pathways.  
554 Instead, most of the BDR-associated genes identified in this study are related to lung  
555 function and allergic response, including total IgE levels and cytokine production in  
556 mast cells. This suggests that at least part of BDR may be due to the predisposition  
557 or intrinsic state of airway smooth muscle cells. Genetic variation may determine  
558 individuals' intrinsic expression levels of candidate genes, which in turn determine  
559 whether their response to albuterol is beneficial.

560 A higher percentage of African ancestry often implies a higher degree of genetic  
561 variation [74]. Although Puerto Ricans have higher proportions of African ancestry  
562 than Mexicans (**Table 1**), they have fewer population-specific SNPs, an observation  
563 that is consistent with findings from our contributions to the 1000 Genomes Project  
564 [75] and our independent work. This is likely due to the fact that Puerto Ricans have  
565 gone through recent population bottlenecks [76]. We demonstrated that Puerto  
566 Ricans may be more genetically related than expected [76], suggesting that our  
567 current relatedness filters may be too conservative for Puerto Ricans.

568 Including admixed populations in whole genome sequencing studies has  
569 important scientific implications. First, it allows for discovery of genetic variation of  
570 multiple ancestral populations in a single study. Second, it is extremely useful to  
571 study admixed populations with ancestries that are currently underrepresented in  
572 existing genetic repositories. For example, the widely popular PCSK9 inhibitors used  
573 to treat hypercholesterolemia were discovered by studying the genetics of African  
574 Americans but the biology and final drug development have benefited all patients  
575 regardless of race/ethnicity [77]. Finally, studying admixed populations such as

576 Mexicans will enhance the understanding of genetic variation in Native American  
577 ancestry, an area that is currently lacking in all major sequencing efforts.

578 Although an extensive effort was made to replicate the top BDR-associated  
579 variants, we were unable to replicate our results because few studies of non-  
580 European populations exist, as we and others have documented [34-36, 78]. Our  
581 efforts to perform replication of rare BDR-associated variants were further hindered  
582 by the lack of studies with whole genome sequencing data. These challenges  
583 highlight the need to include more racially/ethnically diverse populations in all  
584 clinical and biomedical research.

585 In an era of precision medicine, addressing questions about the impact of genetic  
586 factors on therapeutic drug response in globally diverse populations is essential for  
587 making precision medicine socially and scientifically precise [5]. This study  
588 advances our understanding of genetic analysis in admixed populations and may  
589 play an important role in advancing the foundation of precision medicine for  
590 understudied and racially and ethnically diverse populations.

## 591 **METHODS**

### 592 **Data availability**

593 TOPMed whole genome sequencing data are available to download by submitting a  
594 data access request through dbGaP. The dbGaP study accession numbers for GALA II  
595 and SAGE II are phs000920.v1.p1 and phs000921.v1.p1. WGS and array genotype  
596 data for each study are available through dbGaP under the same accession numbers.

## 597 **Study cohorts and sample details**

598 This study examined a subset of subjects with asthma from the Study of African  
599 Americans, Asthma, Genes & Environments (SAGE II) [49, 79-81] and the Genes-  
600 Environments & Admixture in Latino Americans (GALA II) study [27]. SAGE II  
601 recruited African American subjects from the San Francisco Bay area. GALA II  
602 recruited Latino subjects from Puerto Rico and the mainland United States (Bronx,  
603 NY; Chicago, IL; Houston, TX; San Francisco Bay Area, CA). Ethnicity of the subjects  
604 was self-reported and all four of the participant's biological grandparents must have  
605 reported the same ethnicity.

606 A total of 1,484 individuals from three ethnic groups (494 Puerto Ricans, 500  
607 Mexicans and 490 African Americans), representing the extremes of the  
608 bronchodilator response (BDR, see below) distribution were selected for whole  
609 genome sequencing. Genomic DNA was extracted and purified from whole blood  
610 using Wizard® Genomic DNA Purification Kits (Promega, Madison, WI, USA).

## 611 **Bronchodilator response measurements**

612 Spirometry was performed and BDR (i.e.,  $\Delta FEV_1$ , defined as the relative change in  
613  $FEV_1$ ) was calculated as previously described [27]. In brief, BDR was calculated  
614 according to American Thoracic Society/European Respiratory Society guidelines  
615 [82] as the percent change in  $FEV_1$  after 2 doses of albuterol: that is,  $BDR = (\text{post-}$   
616  $FEV_1 - \text{pre-}FEV_1) / \text{pre-}FEV_1$ .

617 High and low drug responders were selected from the extremes of BDR  
618 distribution from GALA II and SAGE II (**Fig 1**). **S1 Fig** highlighted the BDR

619 distribution of the 1,441 individuals who passed WGS data quality control (see  
620 “WGS data processing and quality control”). The  $\Delta FEV_1$  cutoffs for high and low  
621 responders are as follows: high responders ( $\Delta FEV_1 > 16.29$  for Puerto Ricans,  $> 8.55$   
622 for Mexicans and  $> 11.81$  for African Americans); low responders ( $\Delta FEV_1 < 7.23$  for  
623 Puerto Ricans,  $< 6.05$  for Mexicans and  $< 5.53$  for African Americans).

#### 624 **Analysis on descriptive data of study subjects**

625 Dichotomous variables were tested for association with BDR using Fisher’s exact  
626 test. Continuous variables were tested for normality using the Shapiro-Wilk test.  
627 Normally and non-normally distributed continuous variables were tested using  
628 Student’s t-test and the Wilcoxon rank-sum test, respectively.

#### 629 **Sample quality control and whole genome sequencing**

630 DNA samples were quantified by fluorescence using the Quant-iT PicoGreen dsDNA  
631 assay (ThermoFisher Scientific, Waltham, MA, USA) on a Spectramax fluorometer  
632 (Molecular Devices, Sunnyvale, CA, USA). Sample integrity was ascertained using the  
633 Fragment Analyzer™ (Advanced Analytical Technologies, Inc., Ankeny, IA, USA).  
634 Samples passing QC were genotyped using the HumanCoreExome-24 array  
635 (Illumina®, San Diego, CA, USA). Genotyping results were analyzed using  
636 VerifyIDintensity [83] to flag sample contamination. Sequencing libraries were  
637 constructed using the TruSeq PCR-free DNA HT Library Preparation Kit (Illumina®,  
638 San Diego, CA, USA) with 500ng DNA input. Briefly, genomic DNA was sheared using  
639 a Covaris sonicator (Covaris, Woburn, MA, USA), followed by end-repair and bead-  
640 based size selection of fragmented molecules. Selected fragments were then A-tailed

641 and sequence adaptors were ligated onto the fragments, followed by a final bead  
642 purification of the libraries. Final libraries were reviewed for size distribution using  
643 Fragment Analyzer and quantified by qPCR (Kapa Biosystems, Wilmington, MA,  
644 USA). Libraries were sequenced on a HiSeq X system (Illumina®, San Diego, CA, USA)  
645 with v2 chemistry, using a paired-end read length of 150 bp, to a minimum of 30x  
646 mean genome coverage.

### 647 **WGS data processing and quality control**

648 Sequencing data were demultiplexed using bcl2fastq version 2.16.0.10 (Illumina®,  
649 San Diego, CA, USA) and aligned to human reference hs37d5 with decoy sequences  
650 using BWA-MEM v0.7.8 [84]. Data were further processed using the GATK best-  
651 practices v3.2-2 pipeline [85]. Quality control procedures included marking of  
652 duplicate reads using Picard tools v1.83 (<http://picard.sourceforge.net>),  
653 realignment around indels, and base quality recalibration using 1000 Genomes  
654 Phase 1 high confidence SNPs, HapMap v3.3, dbSNP v137, 1000 Genomes omni2.5,  
655 1000 Genomes Phase 1 indels, and both Mills and 1000 Genomes gold standard  
656 indels. Single-sample genotypes were called using GATK HaplotypeCaller followed  
657 by joint genotyping of all subjects. The resulting multi-sample Variant Call Format  
658 (VCF) file was used for variant quality score recalibration (VQSR). A 99.8% truth  
659 sensitivity tranche level was used for SNPs and 99.0% for indel variants. SNP calls  
660 were used to check for sample contamination using VerifyBAMId [83], and sample  
661 identity was confirmed by requiring > 99.5% concordance with SNP array  
662 (HumanCoreExome-24 array) genotypes.

663 As part of NIH's Trans-Omics for Precision Medicine (TOPMed) Program, BAM  
664 files were submitted to the Informatics Resource Center (IRC) at the University of  
665 Michigan. All 1,484 samples sequenced passed TOPMed's IRC quality control metrics  
666 (mean genome coverage >30X; >95% of genome covered at >10X; and <3%  
667 contamination).

668 VCF-level variants were filtered by GATK version 3.4.46 and VCFtools version  
669 0.1.14 [86]. Variants were filtered according to the following procedures: (1)  
670 remove variants that were not indicated as "PASS" in the VCF FILTER column, (2)  
671 remove variants in low complexity regions [87] (downloaded from  
672 <https://github.com/lh3/varcmp/tree/master/scripts/LCR-hs37d5.bed.gz>), and (3)  
673 keep sample genotypes that have minimum read depths of 10 and genotype  
674 qualities of 20 ( $DP \geq 10$  and  $GQ \geq 20$ ). The ratio of homozygous to heterozygous  
675 variants (hom/het), ratio of transitions to transversions (Ti/Tv), and other variant  
676 summary statistics were generated using GATK VariantEval. VCF files were  
677 converted into PLINK format using PLINK 1.9 software [88] according to  
678 recommended best practices [89]. Genotype consistency between WGS data and  
679 previously published Axiom<sup>®</sup> Genome-Wide LAT 1 array (Affymetrix, Santa Clara,  
680 CA) genotype data (dbGaP phs000920.v1.p1 and phs000921.v1.p1) was assessed  
681 using VCFtools [86]. Individuals with percentage consistency three S.D. below the  
682 mean (< 96.3%) were removed (N=7, **S10 Fig**). Cryptic relatedness was detected  
683 using REAP [90]. Global ancestry and allele frequency used by REAP were estimated  
684 using ADMIXTURE in supervised mode [91]. Related individuals (kinship coefficient  
685 > 0.044, corresponding to a third degree relationship [92]) were excluded from

686 further analysis (N=36), yielding a final sample size of 1,441 for downstream  
687 analysis. Downstream analyses were only performed on biallelic SNPs that passed  
688 all quality filters mentioned above and had less than 10% of genotype missingness.  
689 The 10% genotype missingness filter was applied per population instead of across  
690 all three populations except for the rare variant analysis performed with all three  
691 populations combined (see **Methods** section “Multi-variant analyses of combined  
692 effects of rare variants on BDR”).

### 693 **Principal component analysis**

694 Principal component analysis (PCA) was performed to control for hidden population  
695 substructure using EIGENSTRAT’s smartpca program [93]. After using PLINK 1.9 to  
696 remove biallelic SNPs with low minor allele frequency ( $MAF \leq 0.05$ ) and in linkage  
697 disequilibrium ( $R^2 > 0.5$  in a 50-SNP window with a shift size of 5 SNPs), 710,256  
698 variants remained for input into smartpca.

### 699 **Local ancestry estimation**

700 Reference genotypes for European and African ancestries were obtained from the  
701 Axiom® Genotype Data Set [94]. SNPs with less than a 95% call rate were removed.  
702 Since no Native American reference samples are available in the HapMap database,  
703 reference genotypes for Native American ancestry were generated from 71 Native  
704 American individuals previously genotyped on the Axiom® Genome-Wide LAT 1  
705 array [27].

706 To call local ancestry tracts, we first created a subset of our WGS data  
707 corresponding to sites found on the Axiom® Genome-Wide LAT 1 array, leaving

708 765,321 markers. Using PLINK 1.9, we merged these data with our European (CEU),  
709 African (YRI), and Native American (NAM) reference panels, which overlapped at  
710 434,145 markers. After filtering multi-allelic SNPs and SNPs with > 10% missing  
711 data, we obtained a final merged dataset of 428,644 markers. We phased all samples  
712 using SHAPEIT2 [95] and called local ancestry tracts jointly with RFMix [96] under a  
713 three-way admixture model based on the African, European, and Native American  
714 reference genotypes described above.

### 715 **Variant annotation**

716 TOPMed freeze 2 and 3 variants were annotated using the WGSa annotation  
717 pipeline [97]. Annotated VCF files were downloaded from the TOPMed Data  
718 Coordinating Center SFTP sites. dbSNP150 annotation was added separately by  
719 using VCF file downloaded from NCBI dbSNP ftp site [98]. ENCODE (v4) annotations  
720 were downloaded as BED files from the UCSC Table Browser (Feb.2009  
721 [GRCh37/hg19] assembly). The conversion from GRCh37 to GRCh38 coordinates  
722 was performed using liftOver from the UCSC Genome Browser Utilities [99].

### 723 **Single locus BDR association testing on common variants**

724 An additive logistic regression model was used to evaluate the association of  
725 biallelic common variants (MAF > 1%) with BDR using PLINK 1.9 separately for  
726 each population. Throughout this study, high drug responders were assigned as  
727 cases. Logistic regression models included the covariates age, sex and body mass  
728 index (BMI) categories to account for previously reported confounders of asthma  
729 and BDR [100-107], and the first ten principal components (PCs) to correct for



730 population substructure in admixed populations. BMI and age- and sex-specific BMI  
731 percentiles (BMI-pct) were calculated as previously described [49] and used for  
732 assignment to BMI categories. For subjects aged 20 years and over, BMI categories  
733 were defined as follows: underweight (BMI < 18), normal ( $18 \leq \text{BMI} < 25$ ),  
734 overweight ( $25 \leq \text{BMI} < 30$ ) and obese (BMI  $\geq 30$ ). For subjects under 20 years of  
735 age, BMI categories were defined as follows: underweight (BMI-pct < 5), normal ( $5 \leq$   
736 BMI-pct < 85), overweight ( $85 \leq \text{BMI-pct} < 95$ ) and obese (BMI-pct  $\geq 95$ ). Baseline  
737 lung function (pre-FEV<sub>1</sub>) has a significant impact on variation in BDR drug response.  
738 Pre-FEV<sub>1</sub> was not included as a covariate in association analyses, as variation in pre-  
739 FEV<sub>1</sub> was indirectly captured by several of the ten principal components already  
740 included in association models (**S13 Table**). A correlation matrix showing the  
741 relationship between pre-FEV<sub>1</sub>, age, sex, BMI status, mean global ancestry, and the  
742 top ten principal components is presented in **S13 Table**. The correlation matrix was  
743 constructed using Spearman correlation coefficients and the accompanying  
744 association tests for the significance of each correlation. Population-specific  
745 genome-wide significance thresholds for the single locus analyses were calculated  
746 based on genotypes using the autocorrelation-based *effectiveSize()* function in the R  
747 package 'coda' as published by Sobota *et al.* [41]. Population-specific genome-wide  
748 significance thresholds after adjusting for the effective number of tests (adjusted  
749 genome-wide significance) were  $1.57 \times 10^{-7}$  for Puerto Ricans,  $2.42 \times 10^{-7}$  for  
750 Mexicans, and  $9.59 \times 10^{-8}$  for African Americans. Suggestive significance thresholds  
751 were calculated as one divided by the effective number of tests [43]. Linkage  
752 disequilibrium patterns (Genome build: hg19/1000 Genomes Nov 2014 AMR) of the

753 flanking regions of BDR-associated SNPs were visualized using LocusZoom [108].  
754 Quantile-quantile (q-q) plots were generated using a uniform distribution as the  
755 expected *p*-value distribution (**S11 Fig a-c**). The genomic inflation factor ( $\lambda_{GC}$ ) was  
756 calculated using the R package ‘*gap*’.

#### 757 **Trans-ethnic meta-analysis of common variant effects on BDR**

758 A meta-analysis of the effects of common variants on BDR across the three  
759 populations was performed using METASOFT [109]. We used the Han and Eskin  
760 random effects model optimized for detecting associations under heterogeneous  
761 genetic effects from different study conditions [109]. The number of effective tests  
762 was estimated using the R package ‘*coda*’ as described above, yielding an adjusted  
763 genome-wide significance threshold of  $3.53 \times 10^{-7}$  and a suggestive significance  
764 threshold of  $7.06 \times 10^{-6}$ . Allele frequency variation in the world population was  
765 visualized using the Geography of Genetic Variants Browser (GGV) beta v0.92 [110].  
766 The q-q plot and  $\lambda_{GC}$  were generated in the same way as described above (**S11 Fig d**,  
767 see **Methods** section, “Single locus BDR association testing on common variants”).

#### 768 **Calculation of variation in BDR explained by common variants**

769 Total variation in BDR explained was estimated by calculating McFadden’s pseudo  
770  $R^2$  [111] in each population separately, after first pruning significantly and  
771 suggestively associated variants (**Table 4**) for LD using the LD prune function in  
772 PLINK 1.9 ( $R^2$  cut-off: 0.6, window size = 50 SNPs, shift = 5 SNPs). Calculation of  
773 pseudo  $R^2$  was adjusted for age, sex, BMI category, and principal components 1-10.  
774 McFadden’s Pseudo  $R^2$  is defined as:

$$R^2 = 1 - \frac{\ln L (M_{FULL})}{\ln L (M_{INTERCEPT})}$$

775  $L$ : Estimated likelihood of model

776  $M_{FULL}$ : Model with all predictors

777  $M_{INTERCEPT}$ : Model with no predictors

778 **Multi-variant analyses of combined effects of common and rare variants on**  
779 **BDR**

780 Combined effects of common and rare variants on BDR were analyzed using SKAT-O  
781 [59]. Common and rare variants were collapsed into 1kb windows sliding across the  
782 GRCh37 genome in steps of 500 base pairs. A total of 5.3 million windows were  
783 analyzed and the R package '*coda*' was used to determine the number of effective  
784 tests based on autocorrelation of the association  $p$ -value, as described above.  
785 Adjusted genome-wide significance thresholds for Puerto Ricans ( $8.15 \times 10^{-8}$ ),  
786 Mexicans ( $8.60 \times 10^{-8}$ ), African Americans ( $6.94 \times 10^{-8}$ ) and for all three populations  
787 combined ( $1.53 \times 10^{-7}$ ) were used to identify windows of variants significantly  
788 associated with BDR. The same covariates used for common variant association  
789 testing were used for analyses of individual populations. For analyses of individuals  
790 combined across all three populations, we avoided confounding from population  
791 substructure by including local ancestry as additional covariates, defined as the  
792 proportions of Native American and African ancestries for the window under  
793 testing. The q-q plots and  $\lambda_{GC}$  were generated in the same way as described above

794 (S12 Fig, see **Methods** section, “Single locus BDR association testing on common  
795 variants”).

### 796 **Variation in BDR explained by associated SKAT-O regions**

797 Variation in BDR explained by SKAT-O regions was calculated as described above  
798 for common variant analyses using McFadden’s pseudo  $R^2$  [111], but with one  
799 addition: variants were weighted using a weighted kernel as described in SKAT-O  
800 [112].

### 801 **Single locus BDR association and trans-ethnic meta-analysis of array data**

802 To address the discrepancy between our current common variant analysis results  
803 with previously published BDR GWAS results [27], we used 1,414 of the 1,441  
804 individuals who had both Axiom® Genome-Wide LAT 1 array (see **Methods** section,  
805 “WGS data processing and QC”) and WGS data available to rerun the single locus  
806 BDR association testing and trans-ethnic meta-analysis. Array data were imputed to  
807 the Haplotype Reference Consortium [113] (HRC release 1) panel using the  
808 Michigan Imputation Server [114]. We used the top 1,000 BDR-associated SNPs to  
809 examine the relationship between array-based and WGS-based association  $p$ -values,  
810 genotype discordance, and imputation  $R^2$ . Correlation between the array-based and  
811 WGS-based association  $p$ -values was determined by Spearman correlation. We also  
812 performed single locus BDR association testing and trans-ethnic meta-analysis by  
813 applying linear regression on 1,122 Puerto Ricans, 662 Mexicans and 1,105 African

814 Americans using BDR ( $\Delta FEV_1$ ) as a continuous trait. HRC imputed array-based data  
815 and the same covariates as described above were used for the analysis.

### 816 **Replication of top BDR-associated common variants**

817 Replication cohorts included the Genetics of Asthma in Latino Americans Study  
818 (GALA I) [13, 115], the Study of African Americans, Asthma, Genes & Environments  
819 (SAGE I) [80], a case-control study of childhood asthma in Puerto Ricans (HPR)  
820 [116], the Study of Asthma Phenotypes and Pharmacogenomic Interactions by Race-  
821 Ethnicity (SAPPHIRE) [117] and a cohort from the Children's Hospital of  
822 Philadelphia (CHOP) [118]. Descriptive statistics for the replication cohorts are  
823 shown in **S6 Table**.

824 Logistic regression in replication analyses was performed using the same  
825 population-specific extreme BDR cut-offs applied to the discovery analyses in the  
826 current study (see **Methods** section, "Bronchodilator response measurements"). All  
827 27 significantly and suggestively associated SNPs from the discovery analysis  
828 (**Table 4**) were assessed in each replication study population. An additive genetic  
829 model was assumed for each SNP tested. Association models were adjusted for sex,  
830 age, BMI categories, and the first ten principal components as in the discovery  
831 analysis. Meta-analysis across all replication studies was performed using  
832 METASOFT as described above (**Methods**, "Trans-ethnic meta-analysis of common  
833 variant effects on BDR").

834 The GALA I and SAGE I replication cohorts included 108 Puerto Ricans, 202  
835 Mexicans and 141 African Americans with BDR measurements and complete data

836 for all covariates (age, sex, BMI categories and the first ten PCs). Genotype data were  
837 imputed to the HRC panel using the Michigan Imputation Server [114]. Replication  
838 in the HPR cohort involved 414 Puerto Rican subjects. Spirometry data were  
839 collected as previously described [119]. Genome-wide genotyping was performed  
840 using the Illumina HumanOmni2.5 BeadChip platform (Illumina Inc., San Diego, CA)  
841 and processed as previously described [120]. Genotype data were phased with  
842 SHAPE-IT [121] and imputation was performed with IMPUTE2 [122] using all  
843 populations from 1000 Genomes Project Phase 3 as reference [75]. The SAPPHERE  
844 replication cohort consisted of 1,022 African Americans with asthma. Genome-wide  
845 genotyping was performed using the Axiom® Genome-Wide AFR 1 array (Affymetrix  
846 Inc., Santa Clara, CA) as previously described [26]. Genotype data were imputed to  
847 the cosmopolitan 1000 Genomes Phase 1 version haplotypes using the Michigan  
848 Imputation Server [114]. The CHOP replication cohort included 280 African  
849 Americans. Genotyping was performed as described [118], and genotype data were  
850 imputed to the HRC panel using the Sanger Imputation server [113].

#### 851 **Identification of nearest genes for BDR-associated loci**

852 The four nearest transcripts to BDR-associated loci were identified by using the  
853 “closest” command in BEDTools with the parameters “-d -k 4” and the RefSeq gene  
854 annotations (Feb.2009 [GRCh37/hg19] assembly) downloaded in refFlat format  
855 from the UCSC Table Browser [123]. Genes with multiple transcripts were reported  
856 only once. When reporting the nearest gene, the “closest” command in BEDTools  
857 with the parameters “-D a” was applied.

858 **Primary bronchial smooth muscle cell culture**

859 Cryopreserved primary human bronchial smooth muscle from two donors (from  
860 Lonza catalog number CC-2576, lot number 0000212076 and from ATCC catalog  
861 number PCS-130-011, lot number 62326179) was thawed and expanded in Lonza  
862 Smooth Muscle Growth Media (SmGM; catalog number CC-3182) on T75 flasks (E&K  
863 Scientific Products, catalog number 658175).

864 **H3K27ac ChIP-seq assay**

865 Upon reaching 80% confluency, BSMCs were serum-starved by replacing SmGM  
866 with smooth muscle basal media (SmBM) for 24 hours. BSMCs were then grown in  
867 SmBM containing 5% FBS for 4 hours, then fixed in 1% formaldehyde for 10 min  
868 and quenched with 0.125 M glycine for 5 minutes. Cells were removed from the T75  
869 flasks by scraping in cold PBS containing sodium butyrate (20 mM, Diagenode,  
870 catalog number C12020010). Chromatin sheering was carried out using a Covaris S2  
871 sonicator. Sheared chromatin was used for immunoprecipitation with antibodies  
872 against active chromatin marks (H3K27ac; Abcam, ab4729) using the Diagenode  
873 LowCell# ChIP kit (CAT#C01010072), following the manufacturer's protocol.  
874 Libraries were prepared using the Rubicon DNA-Seq kit (CAT#R400406) following  
875 the manufacturer's protocol and sequenced on an Illumina HiSeq 4000 using single-  
876 end 50-bp reads to a sequencing depth of at least 25 million reads (submitted under  
877 BioProject PRJNA369271). Uniquely mapping raw reads were aligned using Bowtie  
878 [124] under default settings. Peak regions for each individual were called using

879 MACS2 [125, 126] and reproducible peaks identified using the ENCODE IDR pipeline  
880 [127].

### 881 **Diverse Convergent Evidence approach for variant prioritization**

882 The Diverse Convergent Evidence (DiCE) approach is a logical, heuristic framework  
883 for integrating multiple types of observational, bioinformatics, and laboratory  
884 evidence to prioritize variants discovered from high throughput genetic studies for  
885 further evaluation in functional experiments [53]. Results from the trans-ethnic  
886 meta-analysis and from the replication analyses were considered observational  
887 data. Laboratory evidence was provided by the identified peaks in our ChIP-seq  
888 analyses performed in BSMCs. Informatic evidence was compiled using Ensembl,  
889 PubMed, the NHGRI-EBI GWAS Catalog, and ENCODE to identify previously reported  
890 associations with BDR or asthma-related phenotypes, and predicted biological  
891 functions associated with assessed loci. After compiling the observational,  
892 informatic and laboratory evidence for each suggestively or significantly associated  
893 variant, DiCE constructs an evidence matrix to estimate the strength of the  
894 information supporting each association. DiCE scores  $> 6$  were considered strong  
895 evidence that a given locus was involved in the pathophysiology of BDR, and  
896 variants with the highest DiCE score, after meeting this criterion, were prioritized  
897 for downstream functional analyses.

### 898 **Luciferase assays**



899 *NFKB1* candidate enhancer sequences were amplified from human genomic DNA  
900 (Roche) using oligonucleotides designed in Primer3 with 18 and 20 bp overhangs  
901 for forward and reverse primers, respectively (5'-GGCCTAACTGGCCGGTAC-3' and  
902 5'-CGCCGAGGCCAGATCTTGAT-3'), complementary to sequences flanking the KpnI  
903 and EcoRV sites in the pGL4.23 Gate A vector (Promega, Madison, WI, USA) using  
904 Phusion High-Fidelity PCR kit (NEB, catalog number M0531S). PCR primers were  
905 designed around the edges of these ChIP-seq peaks and the most complete fragment  
906 that was successfully amplified was used for luciferase assays. PCR products were  
907 then cloned into the pGL4.23 vector using the Gibson Assembly method (NEB,  
908 catalog number E2611S). Smooth muscle cells were plated at 50-70% confluency in  
909 24-well cell culture plates (Falcon, catalog number 353047) and grown to 80%  
910 confluency in SmGM. Transfections were carried out by combining  
911 polyethylenimine (PEI) with DNA vectors at a 1:1 ratio by weight in opti-MEM (Life  
912 Technologies, catalog number 31985070). The transfection mixture consisted of  
913 225 ng of enhancer assay vectors and 25 ng of pGL4.24 (Renilla transfection  
914 efficiency control) with 250 ng of PEI in 50  $\mu$ L of opti-MEM. After 15 minutes, 500  
915  $\mu$ L of SmBM was added to the transfection mixture and the combination added to  
916 cell culture. Cells were incubated for 4 hours in SmBM plus the transfection mixture,  
917 then media was replaced with SmGM for 24 hours. Cells were then washed with PBS  
918 and enhancer assay cells were lysed with 100  $\mu$ L of Passive Lysis Buffer (Promega,  
919 Madison, WI, USA). Reporter activity was measured using the Dual-Luciferase  
920 Reporter Assay System (Promega, Madison, WI, USA) and measured on the Glomax

921 96 well plate luminometer (Promega, Madison, WI, USA). The luciferase assay was  
922 carried out in two separate experiments, with three independent replicates per  
923 experiment (three wells of cells were transfected per construct per experiment).  
924 Each well was then split into two technical replicates for luciferase activity  
925 measurements with a luminometer.

### 926 **RNA extraction, library preparation and sequencing**

927 Among the African American subjects with WGS data in our study, 39 samples were  
928 selected for RNA-seq based on BDR status and the number of copies of low-BDR  
929 associated alleles at rs28450894. The number of samples in each category is shown  
930 in **S14 Table**. Peripheral blood samples were collected into PAXgene Blood RNA  
931 tubes (PreAnalytiX, Hombrechtikon, Switzerland). Total RNA was extracted from  
932 PAXgene Blood RNA tubes using the MagMAX™ for Stabilized Blood Tubes RNA  
933 Isolation Kit (CAT#4451894, Thermo Fisher Scientific, Waltham, MA, USA)  
934 according to manufacturer's protocols. RNA integrity and yield were assessed using  
935 an Agilent 2100 Bioanalyzer (Agilent Technologies, Santa Clara, CA, USA). Globin  
936 depletion was performed using GLOBINclear™ kit (CAT#AM1980, Thermo Fisher  
937 Scientific, Waltham, MA, USA). Library preparation and ribosomal depletion were  
938 performed using KAPA Stranded RNA-seq Kit with RiboErase (CAT#KK8483, Kapa  
939 Biosystems, Wilmington, MA, USA) according to the manufacturer's protocols. Each  
940 sample was uniquely barcoded with NEXTflex™ DNA Barcodes (CAT#514104, Bio  
941 Scientific®, Austin, TX, USA). Barcoded libraries were pooled and sequenced on 4  
942 lanes on a HiSeq 4000 sequencing system (Illumina®, San Diego, CA, USA) with a

943 paired-end read length of 100 bp at the University of California, San Francisco's  
944 Center for Advanced Technology.

#### 945 **RNA-seq data processing and analysis**

946 Raw sequencing reads were aligned to the human reference genome (hg19) using  
947 STAR (v2.4.2a) [128]. Gene read counts were obtained from uniquely mapped reads  
948 based on Ensembl annotation (v75) [129]. DESeq2 [130] was used to analyze read  
949 counts for differential gene expression changes between genotypes, including an  
950 interaction term with genotype and sex (genotype \* sex). We used a linear model to  
951 account for sex, age and library prep batch, and a custom model matrix to correct for  
952 GC content difference between genes. After normalization for sequencing depth and  
953 GC percentage, genes with fewer than an average of five normalized read counts per  
954 sample and fewer than 20 samples with at least one read count were removed. This  
955 filtering process kept 19,592 Ensembl genes for analysis. Fold change, raw and FDR-  
956 adjusted *p*-value for the genotype term was reported. Genes were then further  
957 filtered to analyze the locus surrounding rs28450894 for differential gene  
958 expression by including all genes with a transcriptional start site within 1Mbp of  
959 rs28450894. *P*-values were then corrected using the false discovery rate method to  
960 account for the 13 genes in this locus. Significant level FDR-adjusted *p*-value is  $\leq 0.1$ .

#### 961 **ACKNOWLEDGEMENTS**

962 Whole genome sequencing (WGS) for the Trans-Omics in Precision Medicine  
963 (TOPMed) program was supported by the National Heart, Lung, and Blood Institute

964 (NHLBI). WGS for "NHLBI TOPMed: Genes-environments & Admixture in Latino  
965 Americans (GALA II) Study" (phs000920) and "NHLBI TOPMed: Study of African  
966 Americans, Asthma, Genes and Environments (SAGE II)" (phs000921) was  
967 performed at the New York Genome Center (3R01HL117004-01S3). We  
968 acknowledge New York Genome Center investigators and teams for whole genome  
969 sequencing sample preparation, quality control, data generation, data processing  
970 and initial joint genotyping. Centralized read mapping and genotype calling, along  
971 with variant quality metrics and filtering were provided by the TOPMed Informatics  
972 Research Center (3R01HL-117626-02S1). Phenotype harmonization, data  
973 management, sample-identity QC, and general study coordination were provided by  
974 the TOPMed Data Coordinating Center (3R01HL-120393-02S1). We gratefully  
975 acknowledge the studies and participants who provided biological samples and data  
976 for TOPMed. We also gratefully acknowledge the contributions of the investigators  
977 of the NHLBI TOPMed Consortium ([https://www.nhlbiwgs.org/topmed-banner-](https://www.nhlbiwgs.org/topmed-banner-authorship)  
978 [authorship](https://www.nhlbiwgs.org/topmed-banner-authorship)). C.A.W. would like to declare that the content of this publication does not  
979 necessarily reflect the views or policies of the Department of Health and Human  
980 Services, nor does mention of trade names, commercial products, or organizations imply  
981 endorsement by the U.S. Government.

982     **REFERENCES**

- 983     1.   Lara Akinbami. Centers for Disease Control and Prevention. (2015). Asthma  
984         Prevalence, Health Care Use and Mortality: United States, 2003-05. [online]  
985         Available at: [http://www.cdc.gov/nchs/data/hestat/asthma03-05/asthma03-](http://www.cdc.gov/nchs/data/hestat/asthma03-05/asthma03-05.htm)  
986         05.htm [Accessed 9/12 2017].
- 987     2.   Vos T, Flaxman AD, Naghavi M, Lozano R, Michaud C, et al. (2012) Years lived  
988         with disability (YLDs) for 1160 sequelae of 289 diseases and injuries 1990-  
989         2010: A systematic analysis for the global burden of disease study 2010. *Lancet*  
990         380(9859): 2163-2196.
- 991     3.   World Health Organization. (2017). Asthma. [online] Available at:  
992         <http://www.who.int/mediacentre/factsheets/fs307/en/> [Accessed 9/12  
993         2017].
- 994     4.   World Health Organization. (2007). Global surveillance, prevention and control  
995         of chronic respiratory diseases: a comprehensive approach. [online] Available  
996         at: [http://www.who.int/gard/publications/GARD\\_Manual/en/](http://www.who.int/gard/publications/GARD_Manual/en/) [Accessed 9/12  
997         2017].
- 998     5.   Oh SS, White MJ, Gignoux CR, Burchard EG. (2016) Making precision medicine  
999         socially precise. take a deep breath. *Am J Respir Crit Care Med* 193(4): 348-350.
- 1000    6.   Burchard EG. (2014) Medical research: Missing patients. *Nature* 513(7518):  
1001         301-302.

- 1002 7. Barr RG, Aviles-Santa L, Davis SM, Aldrich TK, Gonzalez F, II, et al. (2016)  
1003 Pulmonary disease and age at immigration among hispanics. Results from the  
1004 Hispanic Community Health Study/Study of Latinos. Am J Respir Crit Care Med  
1005 193(4): 386-395.
- 1006 8. Palmer LJ, Silverman ES, Weiss ST, Drazen JM. (2002) Pharmacogenetics of  
1007 asthma. Am J Respir Crit Care Med 165(7): 861-866.
- 1008 9. Nelson HS. (1995) Beta-adrenergic bronchodilators. N Engl J Med 333(8): 499-  
1009 506.
- 1010 10. Eggleston PA, Malveaux FJ, Butz AM, Huss K, Thompson L, et al. (1998)  
1011 Medications used by children with asthma living in the inner city. Pediatrics  
1012 101(3 Pt 1): 349-354.
- 1013 11. Finkelstein JA, Lozano P, Farber HJ, Miroshnik I, Lieu TA. (2002) Underuse of  
1014 controller medications among medicaid-insured children with asthma. Arch  
1015 Pediatr Adolesc Med 156(6): 562-567.
- 1016 12. Drazen JM, Silverman EK, Lee TH. (2000) Heterogeneity of therapeutic  
1017 responses in asthma. Br Med Bull 56(4): 1054-1070.
- 1018 13. Burchard EG, Avila PC, Nazario S, Casal J, Torres A, et al. (2004) Lower  
1019 bronchodilator responsiveness in puerto rican than in mexican subjects with  
1020 asthma. Am J Respir Crit Care Med 169(3): 386-392.

- 1021 14. Naqvi M, Thyne S, Choudhry S, Tsai HJ, Navarro D, et al. (2007) Ethnic-specific  
1022 differences in bronchodilator responsiveness among african americans, puerto  
1023 ricans, and mexicans with asthma. *J Asthma* 44(8): 639-648.
- 1024 15. Wechsler ME, Castro M, Lehman E, Chinchilli VM, Sutherland ER, et al. (2011)  
1025 Impact of race on asthma treatment failures in the asthma clinical research  
1026 network. *Am J Respir Crit Care Med* 184(11): 1247-1253.
- 1027 16. Martinez FD. (2005) Safety of long-acting beta-agonists--an urgent need to  
1028 clear the air. *N Engl J Med* 353(25): 2637-2639.
- 1029 17. Dixon AE. (2011) Long-acting beta-agonists and asthma: The saga continues.  
1030 *Am J Respir Crit Care Med* 184(11): 1220-1221.
- 1031 18. Nelson HS, Weiss ST, Bleecker ER, Yancey SW, Dorinsky PM, et al. (2006) The  
1032 salmeterol multicenter asthma research trial: A comparison of usual  
1033 pharmacotherapy for asthma or usual pharmacotherapy plus salmeterol. *Chest*  
1034 129(1): 15-26.
- 1035 19. Kramer JM. (2009) Balancing the benefits and risks of inhaled long-acting  
1036 beta-agonists--the influence of values. *N Engl J Med* 360(16): 1592-1595.
- 1037 20. McGeachie MJ, Stahl EA, Himes BE, Pendergrass SA, Lima JJ, et al. (2013)  
1038 Polygenic heritability estimates in pharmacogenetics: Focus on asthma and  
1039 related phenotypes. *Pharmacogenet Genomics* 23(6): 324-328.

- 1040 21. Nieminen MM, Kaprio J, Koskenvuo M. (1991) A population-based study of  
1041 bronchial asthma in adult twin pairs. *Chest* 100(1): 70-75.
- 1042 22. Fagnani C, Annesi-Maesano I, Brescianini S, D'Ippolito C, Medda E, et al. (2008)  
1043 Heritability and shared genetic effects of asthma and hay fever: An Italian study  
1044 of young twins. *Twin Res Hum Genet* 11(2): 121-131.
- 1045 23. Himes BE, Jiang X, Hu R, Wu AC, Lasky-Su JA, et al. (2012) Genome-wide  
1046 association analysis in asthma subjects identifies SPATS2L as a novel  
1047 bronchodilator response gene. *PLoS Genet* 8(7): e1002824.
- 1048 24. Duan QL, Lasky-Su J, Himes BE, Qiu W, Litonjua AA, et al. (2014) A genome-  
1049 wide association study of bronchodilator response in asthmatics.  
1050 *Pharmacogenomics J* 14(1): 41-47.
- 1051 25. Israel E, Lasky-Su J, Markezich A, Damask A, Szeffler SJ, et al. (2015) Genome-  
1052 wide association study of short-acting beta2-agonists. A novel genome-wide  
1053 significant locus on chromosome 2 near ASB3. *Am J Respir Crit Care Med*  
1054 191(5): 530-537.
- 1055 26. Padhukasahasram B, Yang JJ, Levin AM, Yang M, Burchard EG, et al. (2014)  
1056 Gene-based association identifies SPATA13-AS1 as a pharmacogenomic  
1057 predictor of inhaled short-acting beta-agonist response in multiple population  
1058 groups. *Pharmacogenomics J* 14(4): 365-371.



- 1059 27. Drake KA, Torgerson DG, Gignoux CR, Galanter JM, Roth LA, et al. (2014) A  
1060 genome-wide association study of bronchodilator response in latinos implicates  
1061 rare variants. *J Allergy Clin Immunol* 133(2): 370-378.
- 1062 28. Conrad DF, Jakobsson M, Coop G, Wen X, Wall JD, et al. (2006) A worldwide  
1063 survey of haplotype variation and linkage disequilibrium in the human genome.  
1064 *Nat Genet* 38(11): 1251-1260.
- 1065 29. Hoffmann TJ, Zhan Y, Kvale MN, Hesselson SE, Gollub J, et al. (2011) Design  
1066 and coverage of high throughput genotyping arrays optimized for individuals of  
1067 east asian, african american, and latino race/ethnicity using imputation and a  
1068 novel hybrid SNP selection algorithm. *Genomics* 98(6): 422-430.
- 1069 30. Illumina. (2016). Infinium® Multi-Ethnic Global BeadChip. [online] Available  
1070 at: [https://www.illumina.com/content/dam/illumina-](https://www.illumina.com/content/dam/illumina-marketing/documents/products/datasheets/multi-ethnic-global-data-sheet-370-2016-001.pdf)  
1071 [marketing/documents/products/datasheets/multi-ethnic-global-data-sheet-](https://www.illumina.com/content/dam/illumina-marketing/documents/products/datasheets/multi-ethnic-global-data-sheet-370-2016-001.pdf)  
1072 [370-2016-001.pdf](https://www.illumina.com/content/dam/illumina-marketing/documents/products/datasheets/multi-ethnic-global-data-sheet-370-2016-001.pdf) [Accessed 9/12 2017].
- 1073 31. Zheng HF, Rong JJ, Liu M, Han F, Zhang XW, et al. (2015) Performance of  
1074 genotype imputation for low frequency and rare variants from the 1000  
1075 genomes. *PLoS One* 10(1): e0116487.
- 1076 32. Huang J, Howie B, McCarthy S, Memari Y, Walter K, et al. (2015) Improved  
1077 imputation of low-frequency and rare variants using the UK10K haplotype  
1078 reference panel. *Nat Commun* 6: 8111.

- 1079 33. Zhang F, Lupski JR. (2015) Non-coding genetic variants in human disease. Hum  
1080 Mol Genet 24(R1): R102-10.
- 1081 34. Bustamante CD, Burchard EG, De la Vega FM. (2011) Genomics for the world.  
1082 Nature 475(7355): 163-165.
- 1083 35. Popejoy AB, Fullerton SM. (2016) Genomics is failing on diversity. Nature  
1084 538(7624): 161-164.
- 1085 36. Oh SS, Galanter J, Thakur N, Pino-Yanes M, Barcelo NE, et al. (2015) Diversity  
1086 in clinical and biomedical research: A promise yet to be fulfilled. PLoS Med  
1087 12(12): e1001918.
- 1088 37. Hankinson JL, Odencrantz JR, Fedan KB. (1999) Spirometric reference values  
1089 from a sample of the general U.S. population. Am J Respir Crit Care Med 159(1):  
1090 179-187.
- 1091 38. Kircher M, Witten DM, Jain P, O'Roak BJ, Cooper GM, et al. (2014) A general  
1092 framework for estimating the relative pathogenicity of human genetic variants.  
1093 Nat Genet 46(3): 310-315.
- 1094 39. Gulko B, Hubisz MJ, Gronau I, Siepel A. (2015) A method for calculating  
1095 probabilities of fitness consequences for point mutations across the human  
1096 genome. Nat Genet 47(3): 276-283.

- 1097 40. Altshuler D, Daly MJ, Lander ES. (2008) Genetic mapping in human disease.  
1098 Science 322(5903): 881-888.
- 1099 41. Sobota RS, Shriner D, Kodaman N, Goodloe R, Zheng W, et al. (2015)  
1100 Addressing population-specific multiple testing burdens in genetic association  
1101 studies. *Ann Hum Genet* 79(2): 136-147.
- 1102 42. Pe'er I, Yelensky R, Altshuler D, Daly MJ. (2008) Estimation of the multiple  
1103 testing burden for genomewide association studies of nearly all common  
1104 variants. *Genet Epidemiol* 32(4): 381-385.
- 1105 43. Duggal P, Gillanders EM, Holmes TN, Bailey-Wilson JE. (2008) Establishing an  
1106 adjusted p-value threshold to control the family-wide type 1 error in genome  
1107 wide association studies. *BMC Genomics* 9: 516-2164-9-516.
- 1108 44. Wang H, Thomas DC, Pe'er I, Stram DO. (2006) Optimal two-stage genotyping  
1109 designs for genome-wide association scans. *Genet Epidemiol* 30(4): 356-368.
- 1110 45. Skol AD, Scott LJ, Abecasis GR, Boehnke M. (2007) Optimal designs for two-  
1111 stage genome-wide association studies. *Genet Epidemiol* 31(7): 776-788.
- 1112 46. Reed E, Nunez S, Kulp D, Qian J, Reilly MP, et al. (2015) A guide to genome-  
1113 wide association analysis and post-analytic interrogation. *Stat Med* 34(28):  
1114 3769-3792.

- 1115 47. Zaykin DV, Zhivotovsky LA. (2005) Ranks of genuine associations in whole-  
1116 genome scans. *Genetics* 171(2): 813-823.
- 1117 48. Castro-Giner F, de Cid R, Gonzalez JR, Jarvis D, Heinrich J, et al. (2010)  
1118 Positionally cloned genes and age-specific effects in asthma and atopy: An  
1119 international population-based cohort study (ECRHS). *Thorax* 65(2): 124-131.
- 1120 49. White MJ, Risse-Adams O, Goddard P, Contreras MG, Adams J, et al. (2016)  
1121 Novel genetic risk factors for asthma in african american children: Precision  
1122 medicine and the SAGE II study. *Immunogenetics* 68(6-7): 391-400.
- 1123 50. Johnson M. (1998) The beta-adrenoceptor. *Am J Respir Crit Care Med* 158(5 Pt  
1124 3): S146-53.
- 1125 51. Nuzzo R. (2014) Scientific method: Statistical errors. *Nature* 506(7487): 150-  
1126 152.
- 1127 52. Malley JD, Dasgupta A, Moore JH. (2013) The limits of p-values for biological  
1128 data mining. *BioData Min* 6(1): 10-0381-6-10.
- 1129 53. Ciesielski TH, Pendergrass SA, White MJ, Kodaman N, Sobota RS, et al. (2014)  
1130 Diverse convergent evidence in the genetic analysis of complex disease:  
1131 Coordinating omic, informatic, and experimental evidence to better identify and  
1132 validate risk factors. *BioData Min* 7: 10-0381-7-10. eCollection 2014.

- 1133 54. Cumberland PM, Czanner G, Bunce C, Dore CJ, Freemantle N, et al. (2014)  
1134 Ophthalmic statistics note: The perils of dichotomising continuous variables. Br  
1135 J Ophthalmol 98(6): 841-843.
- 1136 55. Peloso GM, Rader DJ, Gabriel S, Kathiresan S, Daly MJ, et al. (2016) Phenotypic  
1137 extremes in rare variant study designs. Eur J Hum Genet 24(6): 924-930.
- 1138 56. Li D, Lewinger JP, Gauderman WJ, Murcay CE, Conti D. (2011) Using extreme  
1139 phenotype sampling to identify the rare causal variants of quantitative traits in  
1140 association studies. Genet Epidemiol 35(8): 790-799.
- 1141 57. Guey LT, Kravic J, Melander O, Burt NP, Laramie JM, et al. (2011) Power in the  
1142 phenotypic extremes: A simulation study of power in discovery and replication  
1143 of rare variants. Genet Epidemiol 35(4): 236-246.
- 1144 58. Lamina C. (2011) Digging into the extremes: A useful approach for the analysis  
1145 of rare variants with continuous traits? BMC Proc 5 Suppl 9: S105-6561-5-S9-  
1146 S105.
- 1147 59. Lee S, Wu MC, Lin X. (2012) Optimal tests for rare variant effects in sequencing  
1148 association studies. Biostatistics 13(4): 762-775.
- 1149 60. Lee JH, McDonald ML, Cho MH, Wan ES, Castaldi PJ, et al. (2014) DNAH5 is  
1150 associated with total lung capacity in chronic obstructive pulmonary disease.  
1151 Respir Res 15: 97-014-0097-y.

- 1152 61. Ortiz RA, Barnes KC. (2015) Genetics of allergic diseases. *Immunol Allergy Clin*  
1153 *North Am* 35(1): 19-44.
- 1154 62. Ramasamy A, Curjuristic I, Coin LJ, Kumar A, McArdle WL, et al. (2011) A  
1155 genome-wide meta-analysis of genetic variants associated with allergic rhinitis  
1156 and grass sensitization and their interaction with birth order. *J Allergy Clin*  
1157 *Immunol* 128(5): 996-1005.
- 1158 63. Naqvi M, Choudhry S, Tsai HJ, Thyne S, Navarro D, et al. (2007) Association  
1159 between IgE levels and asthma severity among african american, mexican, and  
1160 puerto rican patients with asthma. *J Allergy Clin Immunol* 120(1): 137-143.
- 1161 64. Edwards MR, Bartlett NW, Clarke D, Birrell M, Belvisi M, et al. (2009) Targeting  
1162 the NF-kappaB pathway in asthma and chronic obstructive pulmonary disease.  
1163 *Pharmacol Ther* 121(1): 1-13.
- 1164 65. Zhen G, Park SW, Nguyenvu LT, Rodriguez MW, Barbeau R, et al. (2007) IL-13  
1165 and epidermal growth factor receptor have critical but distinct roles in  
1166 epithelial cell mucin production. *Am J Respir Cell Mol Biol* 36(2): 244-253.
- 1167 66. Murgia C, Grosser D, Truong-Tran AQ, Roscioli E, Michalczyk A, et al. (2011)  
1168 Apical localization of zinc transporter ZnT4 in human airway epithelial cells and  
1169 its loss in a murine model of allergic airway inflammation. *Nutrients* 3(11): 910-  
1170 928.

- 1171 67. Besecker B, Bao S, Bohacova B, Papp A, Sadee W, et al. (2008) The human zinc  
1172 transporter SLC39A8 (Zip8) is critical in zinc-mediated cytoprotection in lung  
1173 epithelia. *Am J Physiol Lung Cell Mol Physiol* 294(6): L1127-36.
- 1174 68. Persson H, Kwon AT, Ramilowski JA, Silberberg G, Soderhall C, et al. (2015)  
1175 Transcriptome analysis of controlled and therapy-resistant childhood asthma  
1176 reveals distinct gene expression profiles. *J Allergy Clin Immunol* 136(3): 638-  
1177 648.
- 1178 69. Lin YJ, Chang JS, Liu X, Tsang H, Chien WK, et al. (2015) Genetic variants in  
1179 PLCB4/PLCB1 as susceptibility loci for coronary artery aneurysm formation in  
1180 kawasaki disease in han chinese in taiwan. *Sci Rep* 5: 14762.
- 1181 70. Hersch M, Peter B, Kang HM, Schupfer F, Abriel H, et al. (2012) Mapping  
1182 genetic variants associated with beta-adrenergic responses in inbred mice.  
1183 *PLoS One* 7(7): e41032.
- 1184 71. Dougherty RH, Sidhu SS, Raman K, Solon M, Solberg OD, et al. (2010)  
1185 Accumulation of intraepithelial mast cells with a unique protease phenotype in  
1186 T(H)2-high asthma. *J Allergy Clin Immunol* 125(5): 1046-1053.e8.
- 1187 72. Woodruff PG, Boushey HA, Dolganov GM, Barker CS, Yang YH, et al. (2007)  
1188 Genome-wide profiling identifies epithelial cell genes associated with asthma  
1189 and with treatment response to corticosteroids. *Proc Natl Acad Sci U S A*  
1190 104(40): 15858-15863.

- 1191 73. Motsinger-Reif AA, Jorgenson E, Relling MV, Kroetz DL, Weinshilboum R, et al.  
1192 (2013) Genome-wide association studies in pharmacogenomics: Successes and  
1193 lessons. *Pharmacogenet Genomics* 23(8): 383-394.
- 1194 74. Tishkoff SA, Reed FA, Friedlaender FR, Ehret C, Ranciaro A, et al. (2009) The  
1195 genetic structure and history of africans and african americans. *Science*  
1196 324(5930): 1035-1044.
- 1197 75. 1000 Genomes Project Consortium, Auton A, Brooks LD, Durbin RM, Garrison  
1198 EP, et al. (2015) A global reference for human genetic variation. *Nature*  
1199 526(7571): 68-74.
- 1200 76. Zou JY, Park DS, Burchard EG, Torgerson DG, Pino-Yanes M, et al. (2015)  
1201 Genetic and socioeconomic study of mate choice in latinos reveals novel  
1202 assortment patterns. *Proc Natl Acad Sci U S A* 112(44): 13621-13626.
- 1203 77. Hall SS. (2013) Genetics: A gene of rare effect. *Nature* 496(7444): 152-155.
- 1204 78. Burchard EG, Oh SS, Foreman MG, Celedon JC. (2015) Moving toward true  
1205 inclusion of racial/ethnic minorities in federally funded studies. A key step for  
1206 achieving respiratory health equality in the united states. *Am J Respir Crit Care*  
1207 *Med* 191(5): 514-521.
- 1208 79. Borrell LN, Nguyen EA, Roth LA, Oh SS, Tcheurekdjian H, et al. (2013)  
1209 Childhood obesity and asthma control in the GALA II and SAGE II studies. *Am J*  
1210 *Respir Crit Care Med* 187(7): 697-702.



- 1211 80. Nishimura KK, Galanter JM, Roth LA, Oh SS, Thakur N, et al. (2013) Early-life  
1212 air pollution and asthma risk in minority children. the GALA II and SAGE II  
1213 studies. *Am J Respir Crit Care Med* 188(3): 309-318.
- 1214 81. Thakur N, Oh SS, Nguyen EA, Martin M, Roth LA, et al. (2013) Socioeconomic  
1215 status and childhood asthma in urban minority youths. the GALA II and SAGE II  
1216 studies. *Am J Respir Crit Care Med* 188(10): 1202-1209.
- 1217 82. Pellegrino R, Viegi G, Brusasco V, Crapo RO, Burgos F, et al. (2005)  
1218 Interpretative strategies for lung function tests. *Eur Respir J* 26(5): 948-968.
- 1219 83. Jun G, Flickinger M, Hetrick KN, Romm JM, Doheny KF, et al. (2012) Detecting  
1220 and estimating contamination of human DNA samples in sequencing and array-  
1221 based genotype data. *Am J Hum Genet* 91(5): 839-848.
- 1222 84. Li H, Durbin R. (2009) Fast and accurate short read alignment with burrows-  
1223 wheeler transform. *Bioinformatics* 25(14): 1754-1760.
- 1224 85. DePristo MA, Banks E, Poplin R, Garimella KV, Maguire JR, et al. (2011) A  
1225 framework for variation discovery and genotyping using next-generation DNA  
1226 sequencing data. *Nat Genet* 43(5): 491-498.
- 1227 86. Danecek P, Auton A, Abecasis G, Albers CA, Banks E, et al. (2011) The variant  
1228 call format and VCFtools. *Bioinformatics* 27(15): 2156-2158.

- 1229 87. Li H. (2014) Toward better understanding of artifacts in variant calling from  
1230 high-coverage samples. *Bioinformatics* 30(20): 2843-2851.
- 1231 88. Chang CC, Chow CC, Tellier LC, Vattikuti S, Purcell SM, et al. (2015) Second-  
1232 generation PLINK: Rising to the challenge of larger and richer datasets.  
1233 *Gigascience* 4: 7-015-0047-8. eCollection 2015.
- 1234 89. Genetics For Fun. Best practice for converting VCF files to plink format.  
1235 [online] Available at: [http://apol1.blogspot.nl/2014/11/best-practice-for-](http://apol1.blogspot.nl/2014/11/best-practice-for-converting-vcf-files.html)  
1236 [converting-vcf-files.html](http://apol1.blogspot.nl/2014/11/best-practice-for-converting-vcf-files.html).
- 1237 90. Thornton T, Tang H, Hoffmann TJ, Ochs-Balcom HM, Caan BJ, et al. (2012)  
1238 Estimating kinship in admixed populations. *Am J Hum Genet* 91(1): 122-138.
- 1239 91. Alexander DH, Novembre J, Lange K. (2009) Fast model-based estimation of  
1240 ancestry in unrelated individuals. *Genome Res* 19(9): 1655-1664.
- 1241 92. Manichaikul A, Mychaleckyj JC, Rich SS, Daly K, Sale M, et al. (2010) Robust  
1242 relationship inference in genome-wide association studies. *Bioinformatics*  
1243 26(22): 2867-2873.
- 1244 93. Price AL, Patterson NJ, Plenge RM, Weinblatt ME, Shadick NA, et al. (2006)  
1245 Principal components analysis corrects for stratification in genome-wide  
1246 association studies. *Nat Genet* 38(8): 904-909.

- 1247 94. Affymetrix. (2014). Axiom genotype data set. [online] Available at:  
1248 [http://www.affymetrix.com/support/technical/  
1249 sample\\_data/axiom\\_db/axiomdb\\_data.affx](http://www.affymetrix.com/support/technical/sample_data/axiom_db/axiomdb_data.affx) [Accessed 4/1 2014].
- 1250 95. Delaneau O, Zagury JF, Marchini J. (2013) Improved whole-chromosome  
1251 phasing for disease and population genetic studies. *Nat Methods* 10(1): 5-6.
- 1252 96. Maples BK, Gravel S, Kenny EE, Bustamante CD. (2013) RFMix: A  
1253 discriminative modeling approach for rapid and robust local-ancestry inference.  
1254 *Am J Hum Genet* 93(2): 278-288.
- 1255 97. Liu X, White S, Peng B, Johnson AD, Brody JA, et al. (2016) WGSA: An  
1256 annotation pipeline for human genome sequencing studies. *J Med Genet* 53(2):  
1257 111-112.
- 1258 98. Sherry ST, Ward MH, Kholodov M, Baker J, Phan L, et al. (2001) dbSNP: The  
1259 NCBI database of genetic variation. *Nucleic Acids Res* 29(1): 308-311.
- 1260 99. Kuhn RM, Haussler D, Kent WJ. (2013) The UCSC genome browser and  
1261 associated tools. *Brief Bioinform* 14(2): 144-161.
- 1262 100. Yao TC, Ou LS, Yeh KW, Lee WI, Chen LC, et al. (2011) Associations of age,  
1263 gender, and BMI with prevalence of allergic diseases in children: PATCH study. *J  
1264 Asthma* 48(5): 503-510.

- 1265 101. Nicolai T, Pereszlenyiova-Bliznakova L, Illi S, Reinhardt D, von Mutius E.  
1266 (2003) Longitudinal follow-up of the changing gender ratio in asthma from  
1267 childhood to adulthood: Role of delayed manifestation in girls. *Pediatr Allergy*  
1268 *Immunol* 14(4): 280-283.
- 1269 102. Joseph M, Elliott M, Zelicoff A, Qian Z, Trevathan E, et al. (2016) Racial  
1270 disparity in the association between body mass index and self-reported asthma  
1271 in children: A population-based study. *J Asthma* 53(5): 492-497.
- 1272 103. Dixon AE, Shade DM, Cohen RI, Skloot GS, Holbrook JT, et al. (2006) Effect of  
1273 obesity on clinical presentation and response to treatment in asthma. *J Asthma*  
1274 43(7): 553-558.
- 1275 104. Ullah MI, Newman GB, Saunders KB. (1981) Influence of age on response to  
1276 ipratropium and salbutamol in asthma. *Thorax* 36(7): 523-529.
- 1277 105. Mohamed MH, Lima JJ, Eberle LV, Self TH, Johnson JA. (1999) Effects of  
1278 gender and race on albuterol pharmacokinetics. *Pharmacotherapy* 19(2): 157-  
1279 161.
- 1280 106. Carroll CL, Bhandari A, Zucker AR, Schramm CM. (2006) Childhood obesity  
1281 increases duration of therapy during severe asthma exacerbations. *Pediatr Crit*  
1282 *Care Med* 7(6): 527-531.

- 1283 107. Forno E, Lescher R, Strunk R, Weiss S, Fuhlbrigge A, et al. (2011) Decreased  
1284 response to inhaled steroids in overweight and obese asthmatic children. *J*  
1285 *Allergy Clin Immunol* 127(3): 741-749.
- 1286 108. Pruim RJ, Welch RP, Sanna S, Teslovich TM, Chines PS, et al. (2010)  
1287 LocusZoom: Regional visualization of genome-wide association scan results.  
1288 *Bioinformatics* 26(18): 2336-2337.
- 1289 109. Han B, Eskin E. (2011) Random-effects model aimed at discovering  
1290 associations in meta-analysis of genome-wide association studies. *Am J Hum*  
1291 *Genet* 88(5): 586-598.
- 1292 110. Marcus JH, Novembre J. (2017) Visualizing the geography of genetic variants.  
1293 *Bioinformatics* 33(4): 594-595.
- 1294 111. McFadden D. (1979) Quantitative methods for analysing travel behavior of  
1295 individuals: Some recent developments. In: Hensher DA, Stopher PR, editors.  
1296 *Behavioural travel modelling*. London: Croom Helm. pp. 279-318.
- 1297 112. Lee S, Emond MJ, Bamshad MJ, Barnes KC, Rieder MJ, et al. (2012) Optimal  
1298 unified approach for rare-variant association testing with application to small-  
1299 sample case-control whole-exome sequencing studies. *Am J Hum Genet* 91(2):  
1300 224-237.

- 1301 113. McCarthy S, Das S, Kretzschmar W, Delaneau O, Wood AR, et al. (2016) A  
1302 reference panel of 64,976 haplotypes for genotype imputation. *Nat Genet*  
1303 48(10): 1279-1283.
- 1304 114. Das S, Forer L, Schonherr S, Sidore C, Locke AE, et al. (2016) Next-generation  
1305 genotype imputation service and methods. *Nat Genet* 48(10): 1284-1287.
- 1306 115. Torgerson DG, Gignoux CR, Galanter JM, Drake KA, Roth LA, et al. (2012)  
1307 Case-control admixture mapping in latino populations enriches for known  
1308 asthma-associated genes. *J Allergy Clin Immunol* 130(1): 76-82.e12.
- 1309 116. Han YY, Forno E, Brehm JM, Acosta-Perez E, Alvarez M, et al. (2015) Diet,  
1310 interleukin-17, and childhood asthma in puerto ricans. *Ann Allergy Asthma*  
1311 *Immunol* 115(4): 288-293.e1.
- 1312 117. Levin AM, Wang Y, Wells KE, Padhukasahasram B, Yang JJ, et al. (2014)  
1313 Nocturnal asthma and the importance of race/ethnicity and genetic ancestry.  
1314 *Am J Respir Crit Care Med* 190(3): 266-273.
- 1315 118. Ong BA, Li J, McDonough JM, Wei Z, Kim C, et al. (2013) Gene network  
1316 analysis in a pediatric cohort identifies novel lung function genes. *PLoS One*  
1317 8(9): e72899.
- 1318 119. Miller MR, Hankinson J, Brusasco V, Burgos F, Casaburi R, et al. (2010)  
1319 Standardisation of lung function testing: The authors' replies to readers'  
1320 comments. *Eur Respir J* 36(6): 1496-1498.

- 1321 120. Chen W, Brehm JM, Lin J, Wang T, Forno E, et al. (2015) Expression  
1322 quantitative trait loci (eQTL) mapping in puerto rican children. PLoS One 10(3):  
1323 e0122464.
- 1324 121. Delaneau O, Marchini J, Zagury JF. (2011) A linear complexity phasing  
1325 method for thousands of genomes. Nat Methods 9(2): 179-181.
- 1326 122. Howie BN, Donnelly P, Marchini J. (2009) A flexible and accurate genotype  
1327 imputation method for the next generation of genome-wide association studies.  
1328 PLoS Genet 5(6): e1000529.
- 1329 123. Karolchik D, Hinrichs AS, Furey TS, Roskin KM, Sugnet CW, et al. (2004) The  
1330 UCSC table browser data retrieval tool. Nucleic Acids Res 32(Database issue):  
1331 D493-6.
- 1332 124. Langmead B, Trapnell C, Pop M, Salzberg SL. (2009) Ultrafast and memory-  
1333 efficient alignment of short DNA sequences to the human genome. Genome Biol  
1334 10(3): R25-2009-10-3-r25. Epub 2009 Mar 4.
- 1335 125. Zhang Y, Liu T, Meyer CA, Eeckhoute J, Johnson DS, et al. (2008) Model-based  
1336 analysis of ChIP-seq (MACS). Genome Biol 9(9): R137-2008-9-9-r137. Epub  
1337 2008 Sep 17.
- 1338 126. Feng J, Liu T, Qin B, Zhang Y, Liu XS. (2012) Identifying ChIP-seq enrichment  
1339 using MACS. Nat Protoc 7(9): 1728-1740.

- 1340 127. Landt SG, Marinov GK, Kundaje A, Kheradpour P, Pauli F, et al. (2012) ChIP-  
1341 seq guidelines and practices of the ENCODE and modENCODE consortia.  
1342 Genome Res 22(9): 1813-1831.
- 1343 128. Dobin A, Davis CA, Schlesinger F, Drenkow J, Zaleski C, et al. (2013) STAR:  
1344 Ultrafast universal RNA-seq aligner. Bioinformatics 29(1): 15-21.
- 1345 129. Flicek P, Amode MR, Barrell D, Beal K, Billis K, et al. (2014) Ensembl 2014.  
1346 Nucleic Acids Res 42(Database issue): D749-55.
- 1347 130. Love MI, Huber W, Anders S. (2014) Moderated estimation of fold change and  
1348 dispersion for RNA-seq data with DESeq2. Genome Biol 15(12): 550.
- 1349
- 1350



1351 **FIGURE CAPTIONS**

1352 **Fig 1.** An overview of the main analyses performed in the current study. More  
1353 detailed descriptions of the discovery and replication cohort demographics and  
1354 analyses performed for common and rare variant analysis can be found in Methods.

1355

1356 **Fig 2.** (a) Number of variants per sample. The bin size is 0.025M variants. (b) Allele  
1357 frequency of biallelic SNPs (relative to GRCh37). (c) Allele frequency of population-  
1358 specific biallelic SNPs. (d) Novel biallelic SNPs based on dbSNP build150.

1359

1360 **Fig 3.** (a) Manhattan plot of the trans-ethnic meta-analysis of single locus BDR  
1361 association testing. Top ten BDR-associated loci are circled. Black line indicates  
1362 universal genome-wide significance threshold ( $5.00 \times 10^{-8}$ ), red line indicates  
1363 adjusted genome-wide significance threshold ( $3.53 \times 10^{-7}$ ), and blue line indicates  
1364 suggestive significance threshold ( $7.06 \times 10^{-6}$ ). (b) Forest plot of the population-  
1365 specific and joint effect of the two most significantly associated SNPs, rs17834628  
1366 and rs35661809. The  $R^2$  between these two SNPs is 0.93 in Puerto Ricans, 0.96 in  
1367 Mexicans and 0.66 in African Americans. (c) The most significantly associated SNP  
1368 (rs17834628) is plotted together with 400kb flanking regions on either side. Color  
1369 of the dots shows the LD of each SNP with rs17834628 based on the 1000 Genomes  
1370 Nov 2014 AMR population. Multiple SNPs in high LD ( $R^2 > 0.8$ , red) reached a  
1371 suggestive significance level.

1372

1373 **Fig 4.** Manhattan plot of SKAT-O analysis of biallelic common and rare SNPs  
1374 grouped by 1kb windows sliding across chromosome 1 to 22 in **(a)** Puerto Ricans  
1375 **(b)** African Americans, **(c)** Mexicans, and **(d)** all populations combined. Bonferroni-  
1376 corrected genome-wide and suggestive significance levels are marked by red and  
1377 blue lines, respectively.  
1378

## 1379 SUPPORTING INFORMATION CAPTIONS

1380 **S1 Fig.** Distribution of bronchodilator drug response (BDR) in Puerto Ricans,  
1381 Mexican (GALA II) and African Americans (SAGE). The 1,441 subjects selected from  
1382 the extreme of the BDR distribution for this study were highlighted.

1383 **S2 Fig.** Global ancestry composition for **(a)** Puerto Ricans, **(b)** Mexicans and **(c)**  
1384 African Americans. Each individual is represented by a vertical line and the ancestry  
1385 composition is colored based on the percentage composition of African (red),  
1386 European (blue) and Native American (green) ancestries.

1387 **S3 Fig.** Plot of the first two principal components of variation based on WGS  
1388 genotypes of 1,441 individuals.

1389 **S4 Fig.** Diverse Convergent Evidence (DiCE) prioritization of 27 common variants  
1390 (**Table 4**). Y-axis indicates the points allotted per SNP for each form of evidence  
1391 according to **S15 Table**: statistical evidence (grey), informatic evidence (blue), and  
1392 experimental evidence (orange). Evidence-specific scores for each SNP are provided  
1393 in the table. SNPs with a DiCE score  $\geq 4$  are labeled with the nearest gene.

1394 **S5 Fig.** Regions overlapped with SNPs in LD with BDR-associated SNPs show  
1395 enhancer activity in BSMCs. **(a)** H3K27ac ChIP-seq peaks in BSMCs overlap with  
1396 SNPs in LD with rs28450894 (marked red). The GRCh37 coordinates are  
1397 chr4:103486504-103491377 for region 1 and chr4:103527184-103531814 for  
1398 region 2. In addition to BSMCs, H3K27ac data is shown for Roadmap Epigenomic

1399 peripheral blood mononuclear cells (PBMSs) and lung tissue, as well as ENCODE  
1400 project data for GM12878, H1 human embryonic stem cell (H1-ESC) line, human  
1401 skeletal muscle cells and myoblasts (HSMM) and normal human epidermal  
1402 keratinocytes (NHEK). **(b)** Luciferase assay results for regions tested for enhancer  
1403 activity in BSMCs. *NFKB1* region 2 significantly increased the expression of  
1404 luciferase over empty vector control (Fold change = 2.24,  $p < 0.01$ ). A red line marks  
1405 a fold change of one compared to the empty vector.

1406 **S6 Fig.** A GGV plot showing the allele frequency of rs2845894 for different  
1407 populations based on 1000 Genomes Project. European populations include CEU  
1408 (Utah residents [CEPH] with northern and western ancestry), FIN (Finnish in  
1409 Finland), GBR (British in England and Scotland), TSI (Toscani in Italia) and IBS  
1410 (Iberian population in Spain). American populations include MXL (Mexican ancestry  
1411 from Los Angeles USA), PUR (Puerto Ricans from Puerto Rico), CLM (Colombians  
1412 from Medellin, Colombia) and PEL (Peruvians from Lima, Peru). African populations  
1413 include ASW (Americans of African ancestry in SW USA), ACB (African Caribbeans in  
1414 Barbados), GWD (Gambian in western divisions in the Gambia), MSL (Mende in  
1415 Sierra Leone), YRI (Yoruba in Ibadan, Nigeria), ESN (Esan in Nigeria) and LWK  
1416 (Luhya in Webuye, Kenya).

1417 **S7 Fig.** Boxplot showing increasing number of copies of low BDR-associated T allele  
1418 of rs28450894 is associated with decreased expression of *SLC39A8* in blood  
1419 regardless of sex ( $p = 0.0066$ , FDR adjusted  $p = 0.0856$ ,  $\log_2(\beta) = -0.327$ ).

1420 **S8 Figure.** Manhattan plot of the single locus BDR association testing for **(a)** Puerto  
1421 Ricans, **(b)** Mexicans and **(c)** African Americans. The horizontal lines are colored  
1422 blue for the suggestive significance thresholds and red for the Bonferroni-adjusted  
1423 genome-wide significance thresholds. Since no associations were close to the  
1424 Bonferroni-adjusted genome-wide significance thresholds in Mexicans and African  
1425 Americans, the red line is only marked in Puerto Ricans.

1426 **S9 Fig.** A comparison of the top 1000 BDR associations between the array-based  
1427 and WGS-based genotype data. **(a)** A plot of association  $p$ -values of array-based and  
1428 WGS-based data. The  $p$ -values from the two data types showed high correlation,  
1429 especially for SNPs with more significant  $p$ -values. Genotype discordance of SAGE II  
1430 **(b)** and GALA II **(c)** WGS SNPs. The corresponding imputation  $R^2$  of the same SNPs  
1431 in the HRC imputed array data is indicated by red ( $R^2 \geq 0.8$ ) or blue ( $R^2 < 0.8$ ).

1432 **S10 Fig.** Percentage genotype concordance between Axiom LAT1 array and WGS  
1433 genotypes. Grey horizontal lines mark one, two and three standard deviations (S.D.)  
1434 from the mean percentage genotype concordance.

1435 **S11 Fig.** Quantile-quantile (q-q) plots of the single locus BDR association for **(a)**  
1436 Puerto Ricans, **(b)** Mexicans and **(c)** African Americans and **(d)** trans-ethnic meta-  
1437 analysis. The genomic inflator factors ( $\lambda_{GC}$ ) are shown on the q-q plots.

1438 **S12 Fig.** Quantile-quantile (q-q) plots of SKAT-O analysis of biallelic common and  
1439 rare SNPs grouped by 1kb windows for **(a)** Puerto Ricans, **(b)** Mexicans and **(c)**

1440 African Americans and **(d)** all individuals in all three populations. The genomic  
1441 inflator factors ( $\lambda_{GC}$ ) are shown on the q-q plots.

1442 **S1 Table.** Novel common variants in discovery cohort by population.

1443 **S2 Table.** Chromosomal location of BDR-associated common variants.

1444 **S3 Table.** Common variant BDR association results by population.

1445 **S4 Table.** Lung-related phenotypes previously reported for BDR-associated  
1446 common variants and their nearest genes.

1447 **S5 Table.** Variation in BDR Status explained by significant and suggestively  
1448 associated variants identified by trans-ethnic meta-analysis and SKAT-O.

1449 **S6 Table.** Descriptive statistics for replication cohorts.

1450 **S7 Table.** Replication of common variant associations.

1451 **S8 Table.** Size of DNA inserts used in luciferase assay and key variants included  
1452 within those sequences.

1453 **S9 Table.** Functional annotations for BDR-associated common variants in Table 4.

1454 **S10 Table.** Replication of previously reported BDR-associated SNPs in the current  
1455 study by population and trans-ethnic meta-analysis.

1456 **S11 Table.** Chromosomal location of identified SKAT-O regions by genome build.

1457 **S12 Table.** Functional annotations for variants within SKAT-O regions.

1458 **S13 Table.** Correlation between baseline lung function, top ten principle  
1459 components, other covariates included in association analyses in the discovery  
1460 study population (N =1,441).

1461 **S14 Table.** Number of African American samples selected for RNA-Seq based on  
1462 BDR status and number of copies of low BDR-associated allele.

1463 **S15 Table.** Diverse Convergent Evidence (DiCE) approach scoring rubric.

## Total Available Subjects

GALA II / SAGE

6,172 Subjects

- 2,319 PR
- 1,556 MX
- 2,297 AA
- 830 Others

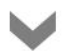

**WGS Study Population Selection**  
(Extremes of BDR distribution)

1,484 Subjects

- 494 PR
- 500 MX
- 490 AA

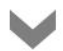

**WGS Quality Control**

1,441 Subjects

- 483 PR
- 483 MX
- 475 AA

## Discovery Analysis

Common variant

*Logistic regression*

PR

MX

AA

Meta-analysis

Common and rare variant

*SKAT-O, 1kb, 500bp increment*

PR

MX

AA

Combined

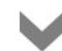

**Replication of 27 Associated Common Variants**

*BDR (high/low)*

GALA I (18/90 PR, 105/97 MX), SAGE I (57/84 AA), HPR (42/372 PR),  
SAPPHIRE (465/557 AA), CHOP (158/122 AA)

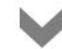

**Perform CHIP-seq to Identify H3K27ac Peaks in BSMC**

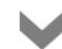

**Prioritize Associated Loci for Further Analyses**

*DiCE Priority Score*

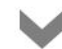

**Identify NFKB1 Loci as Highest Priority for Further Analyses**

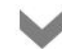

**Functional analyses**

*Luciferase assay, RNA-seq (39 AA)*



a

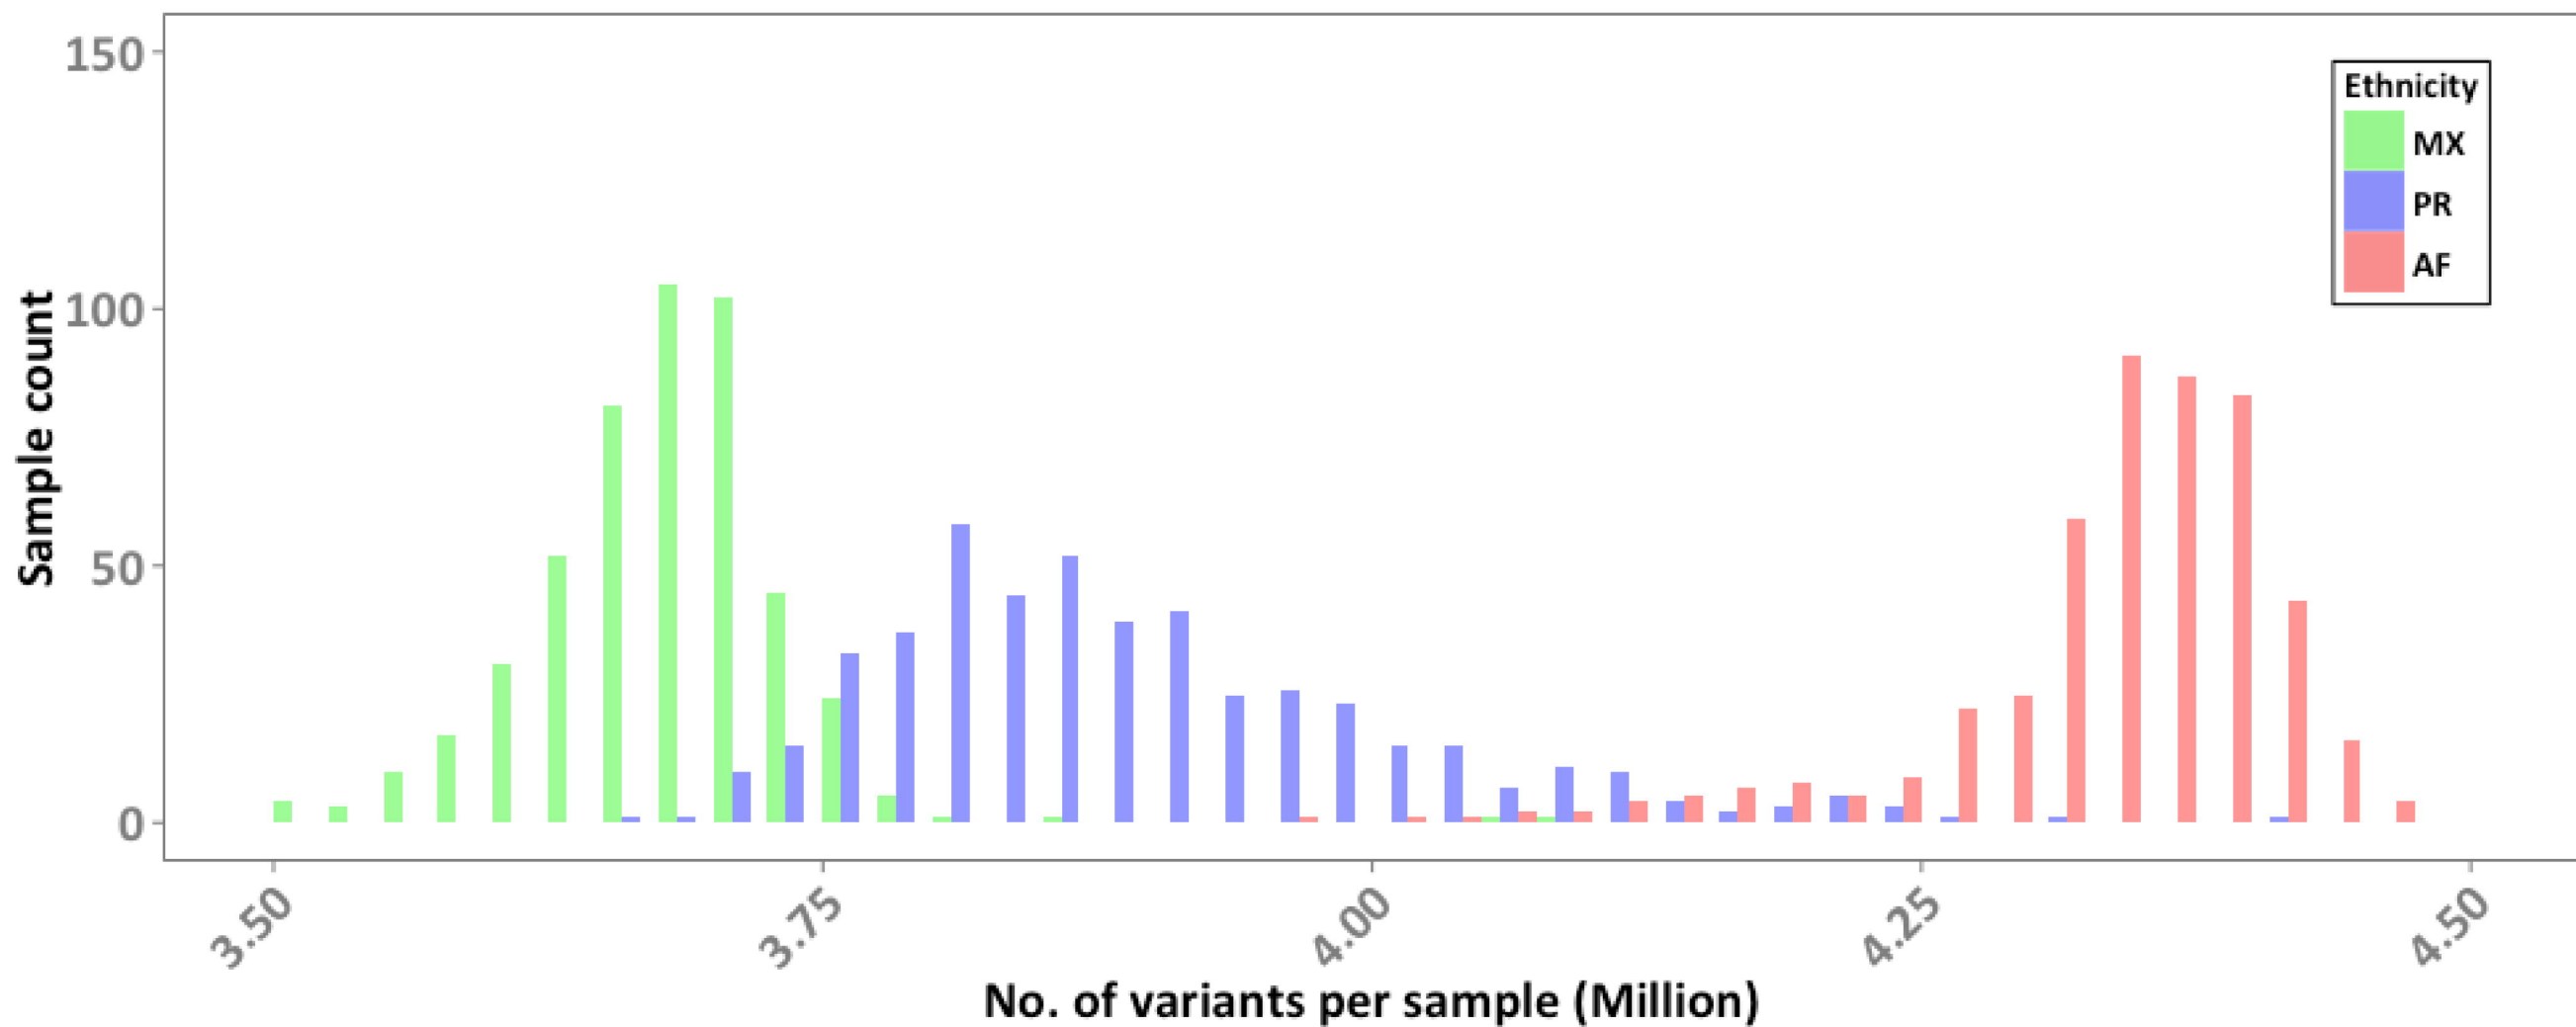

b

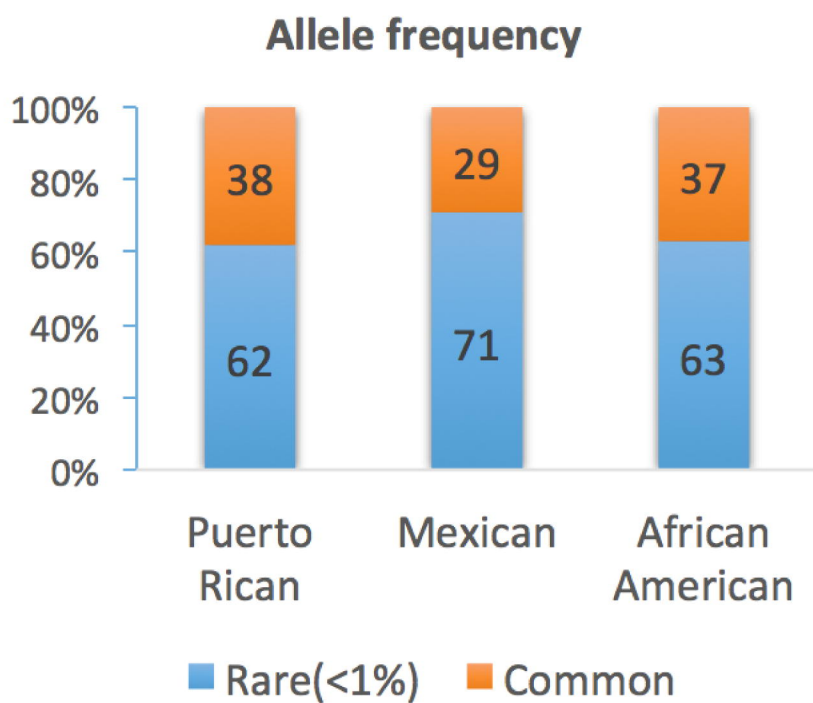

c

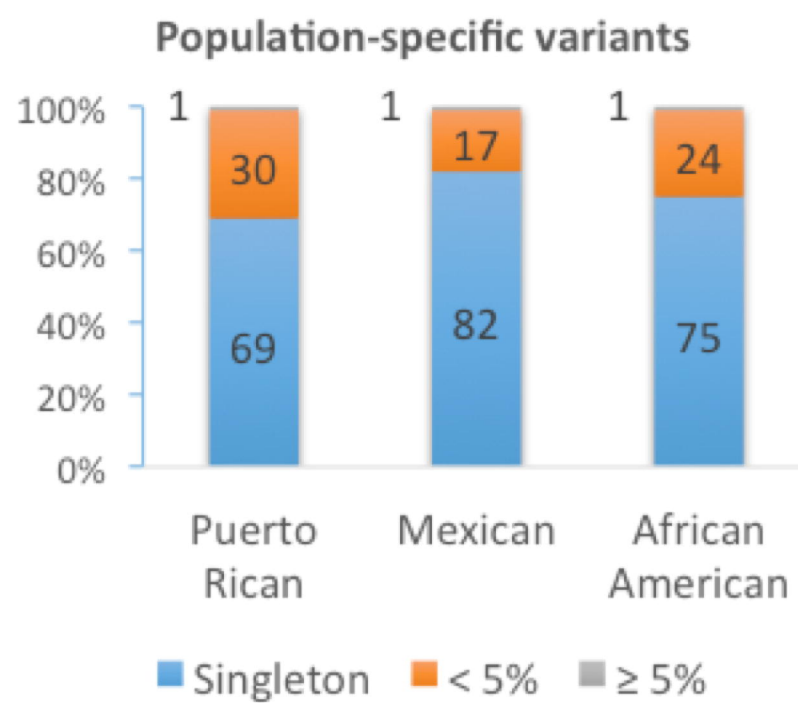

d

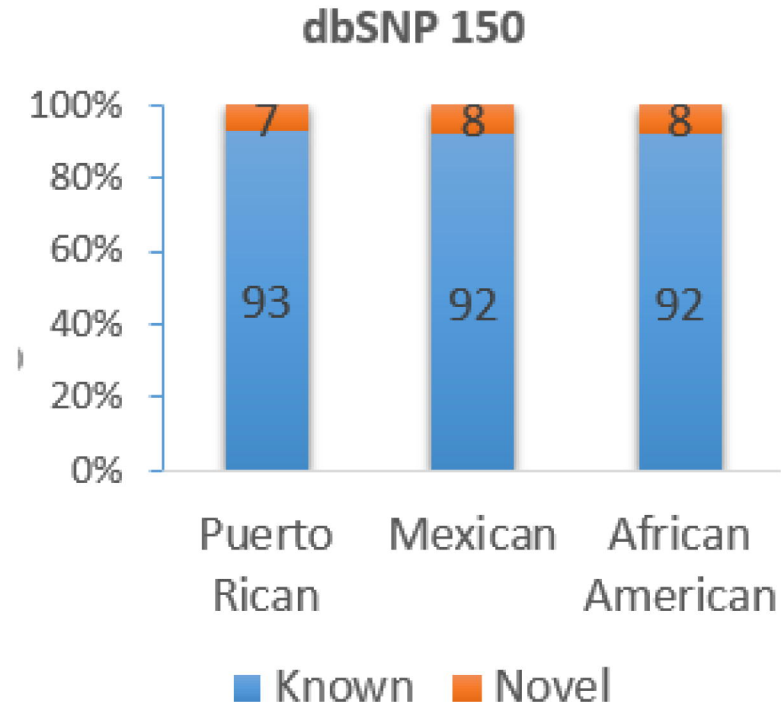

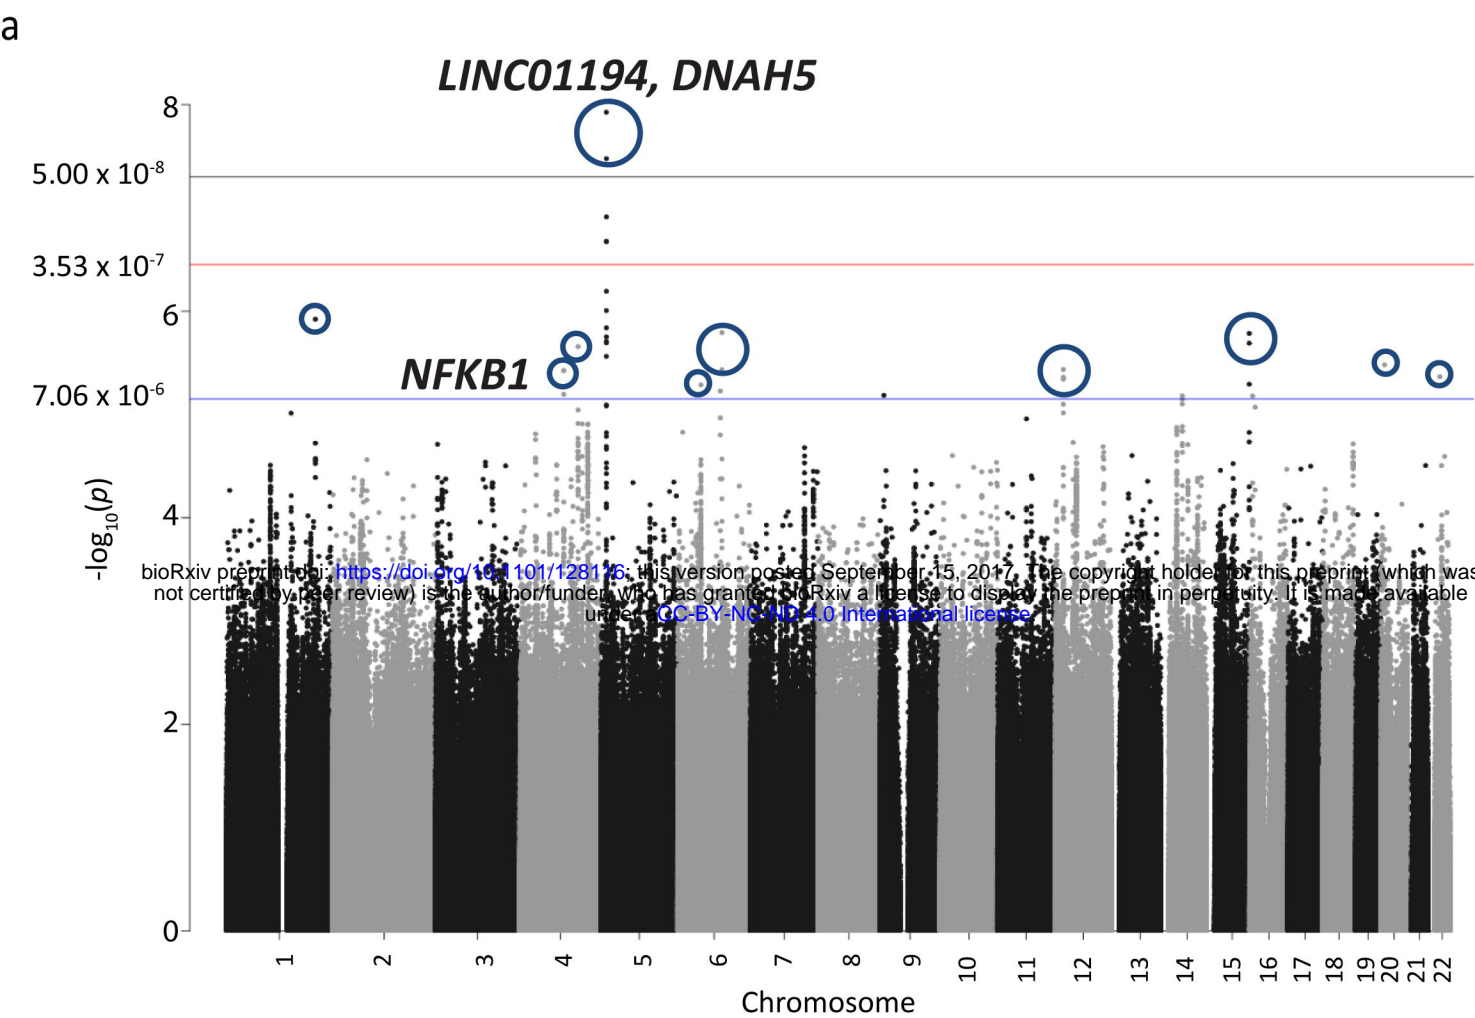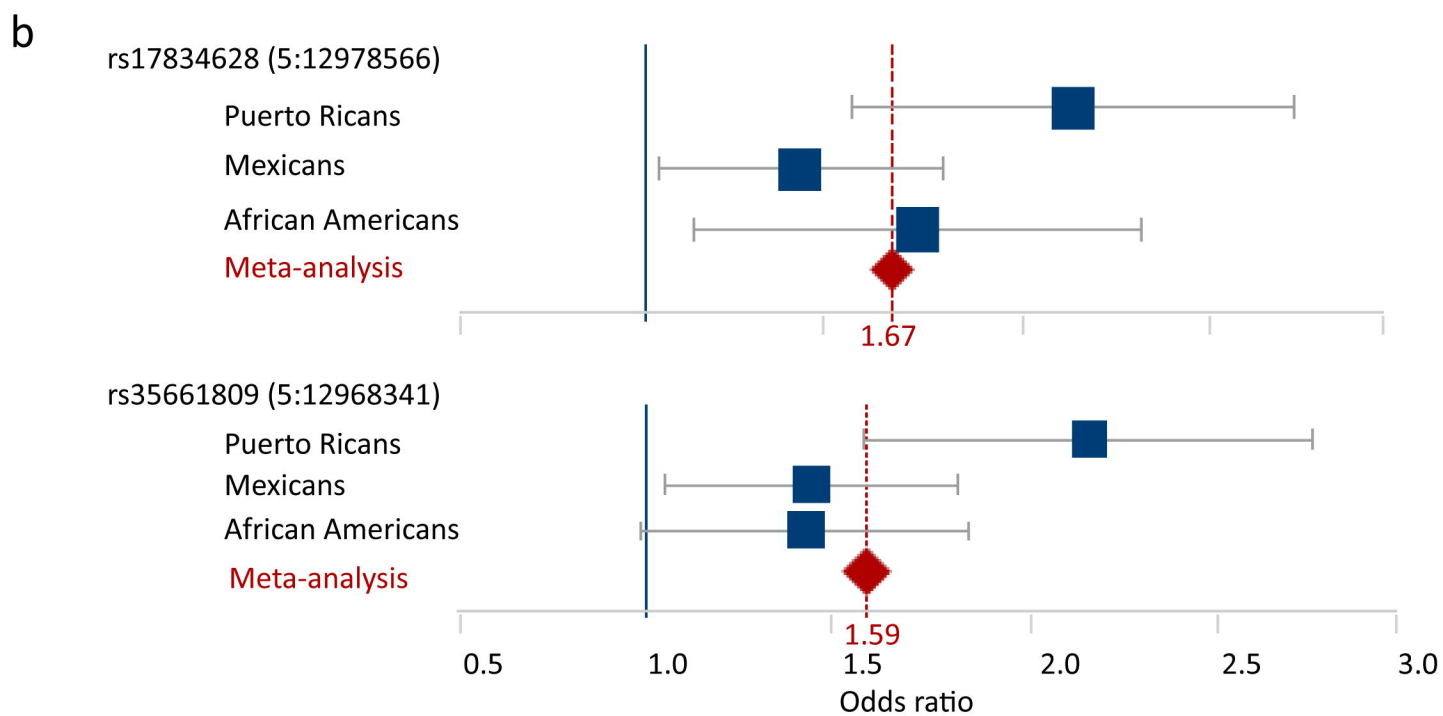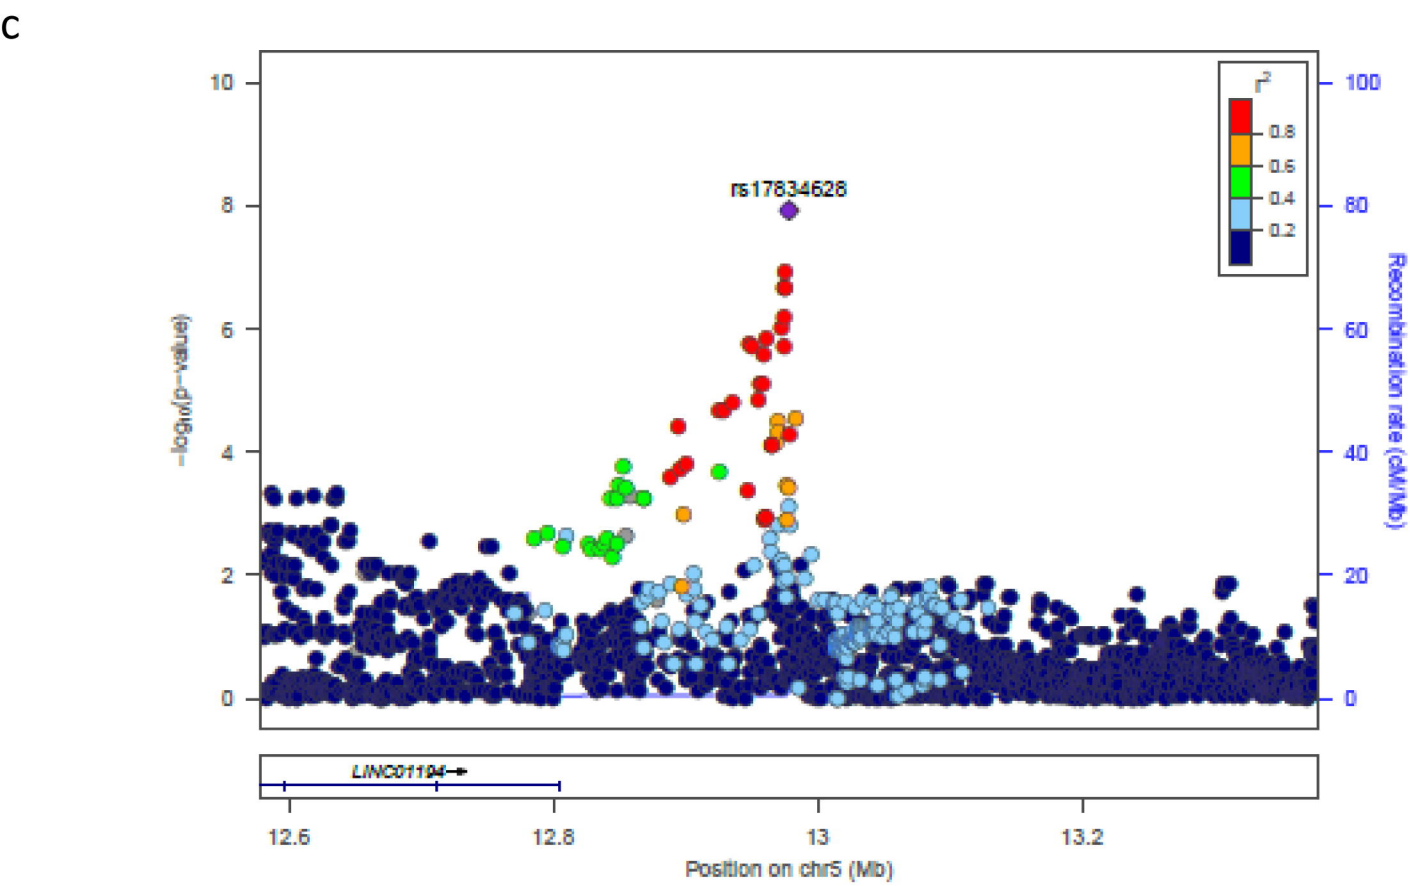

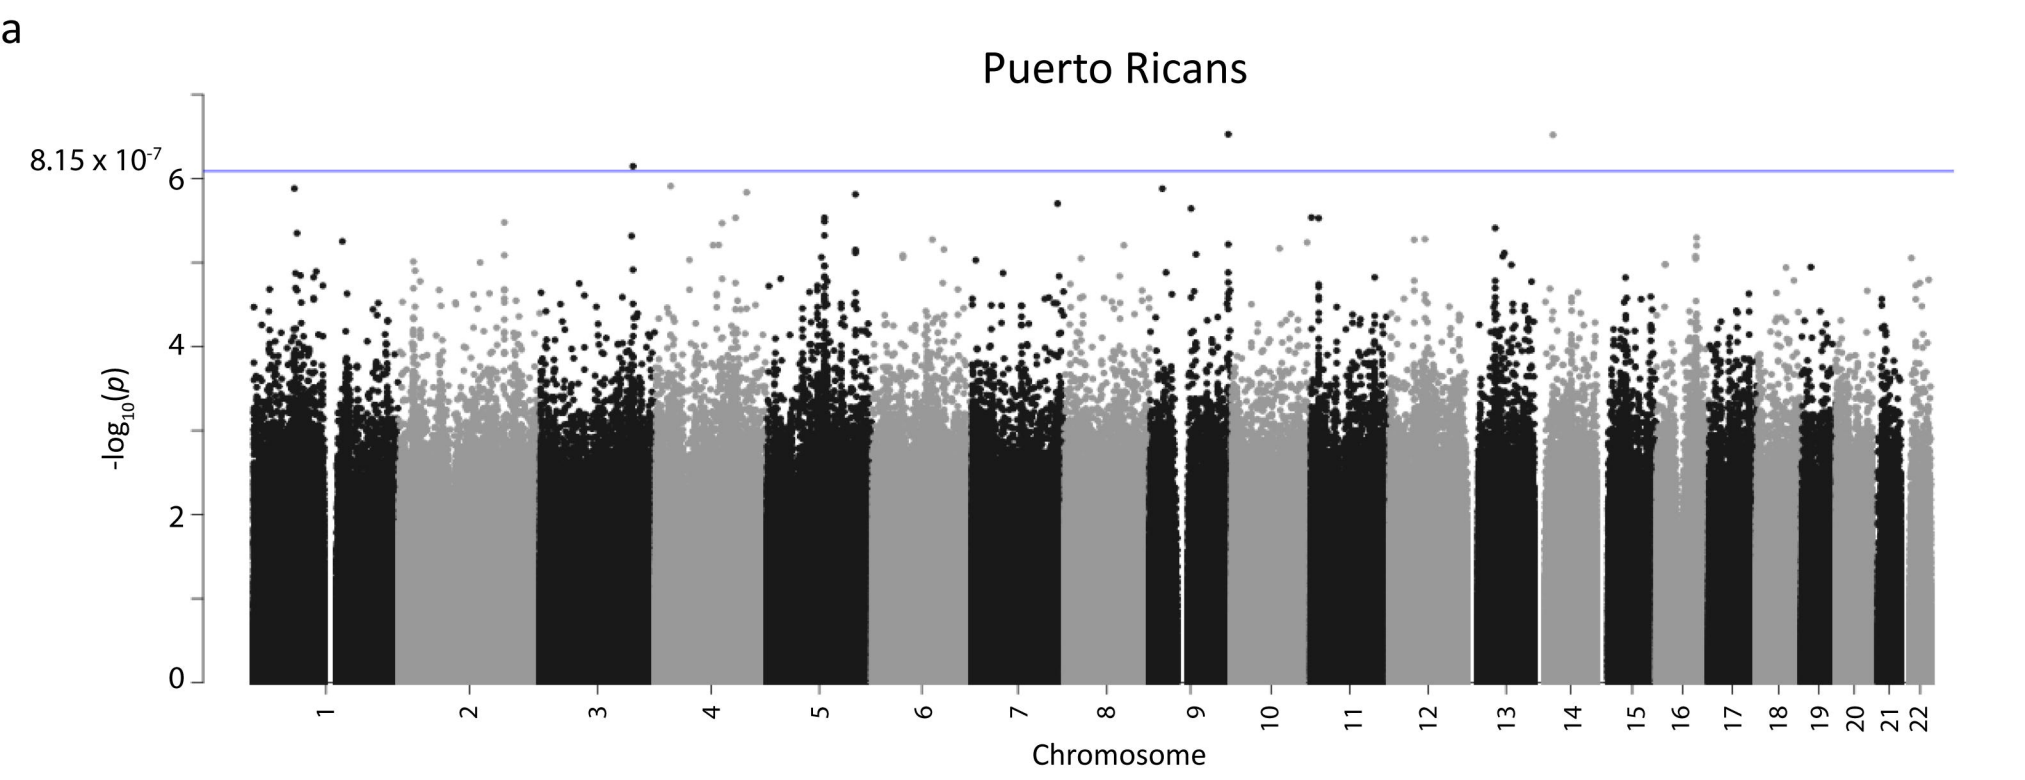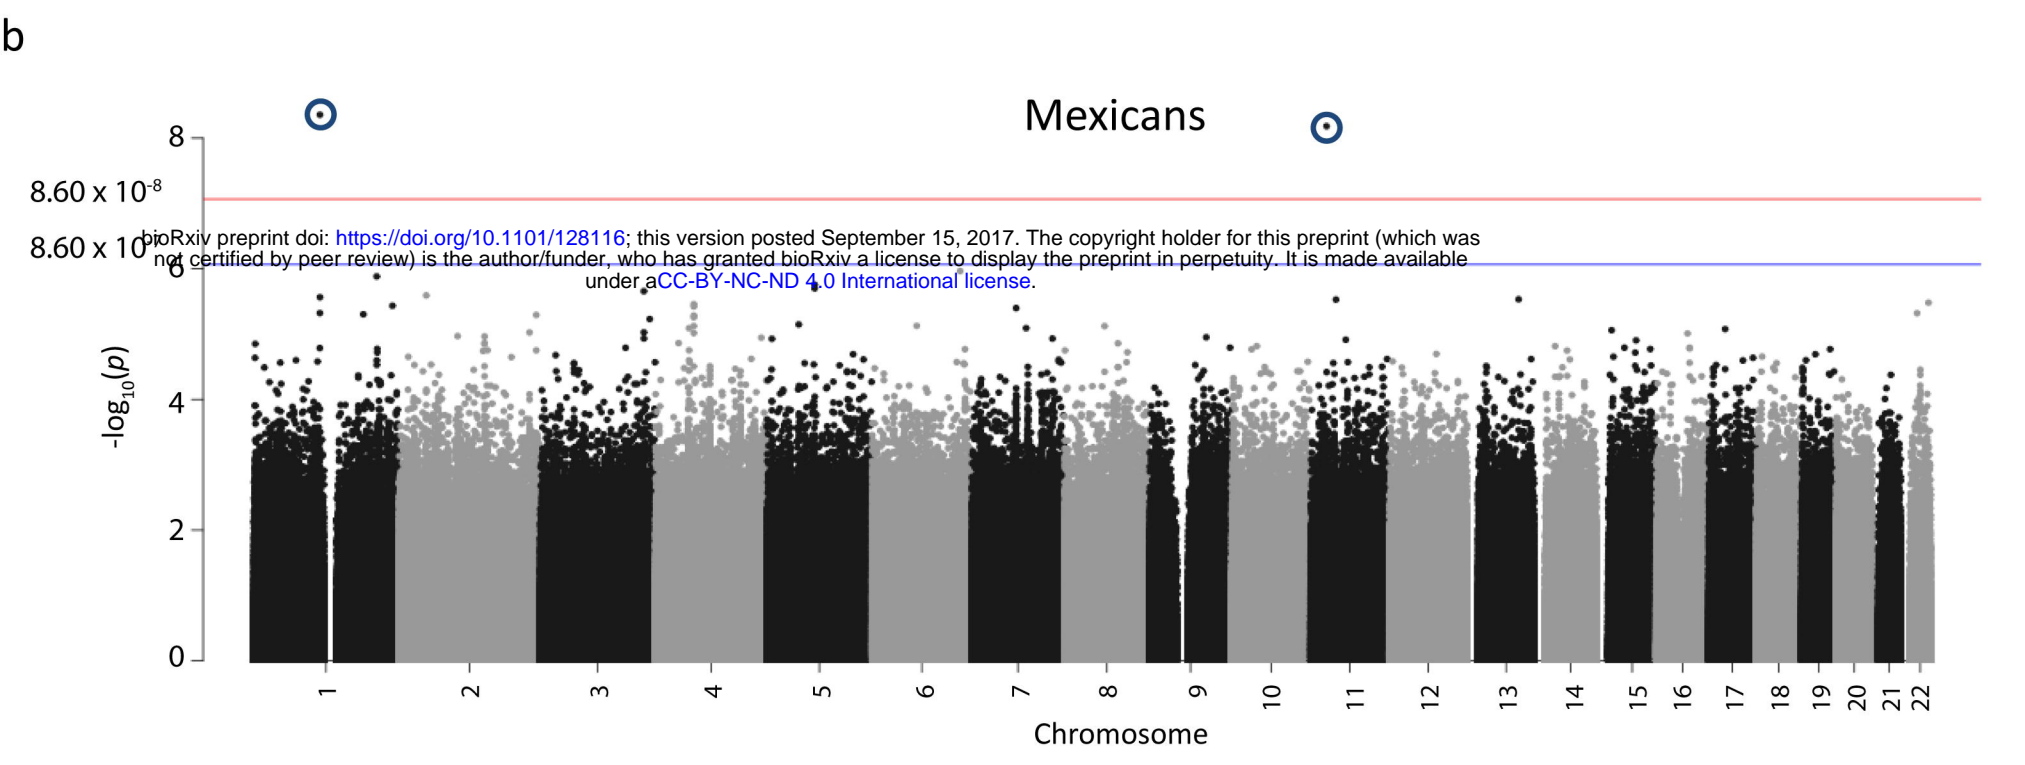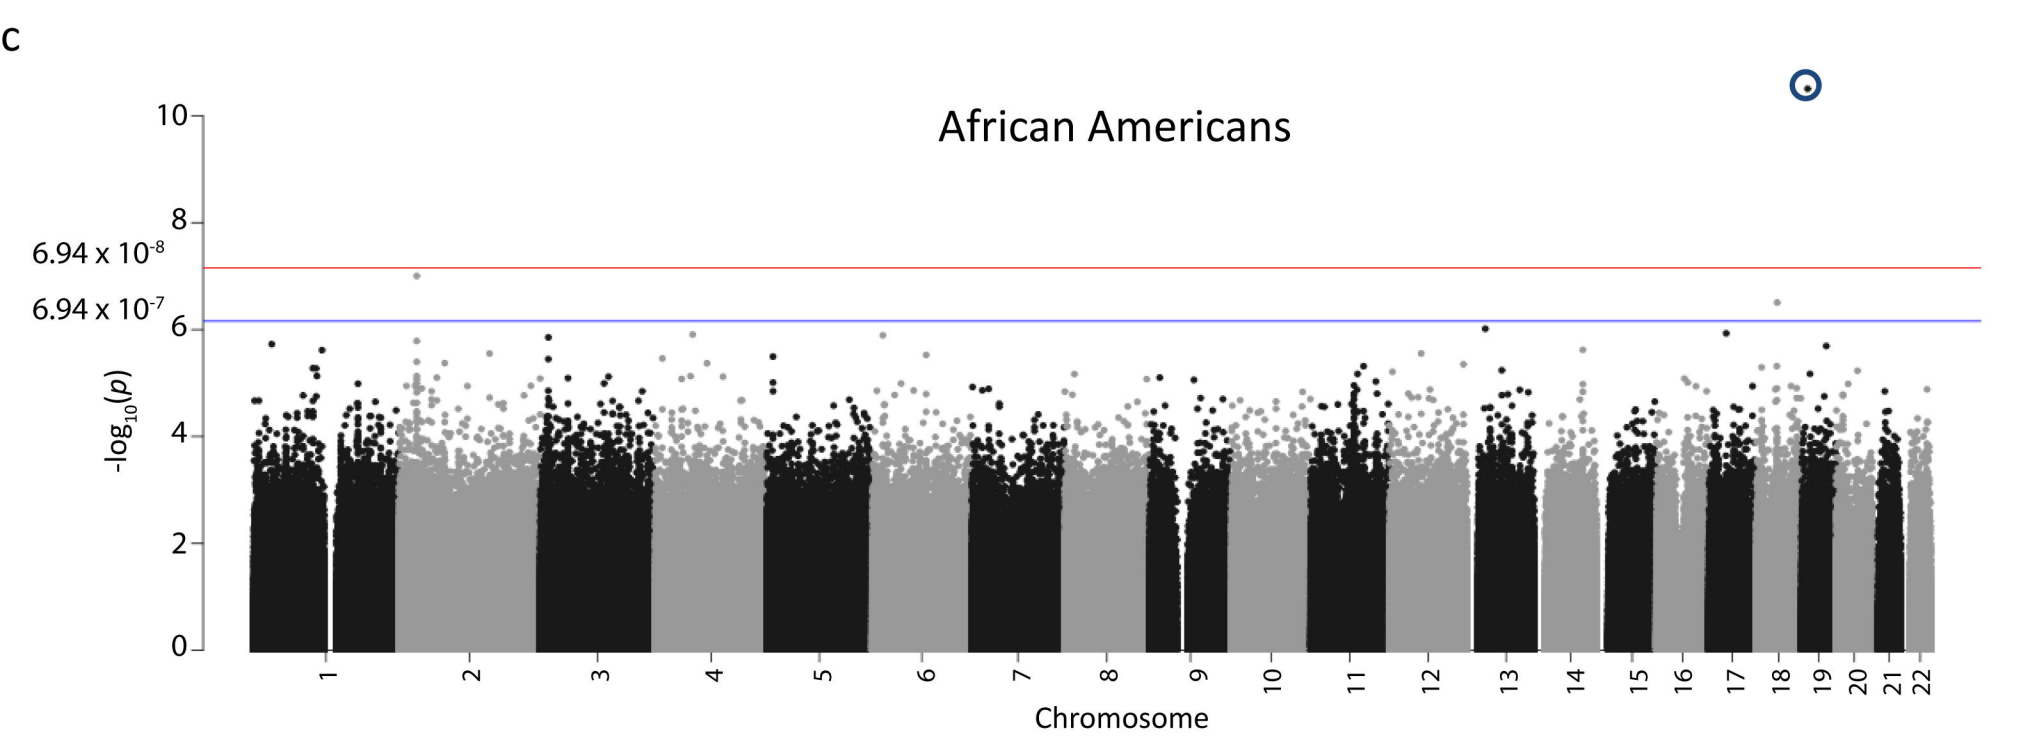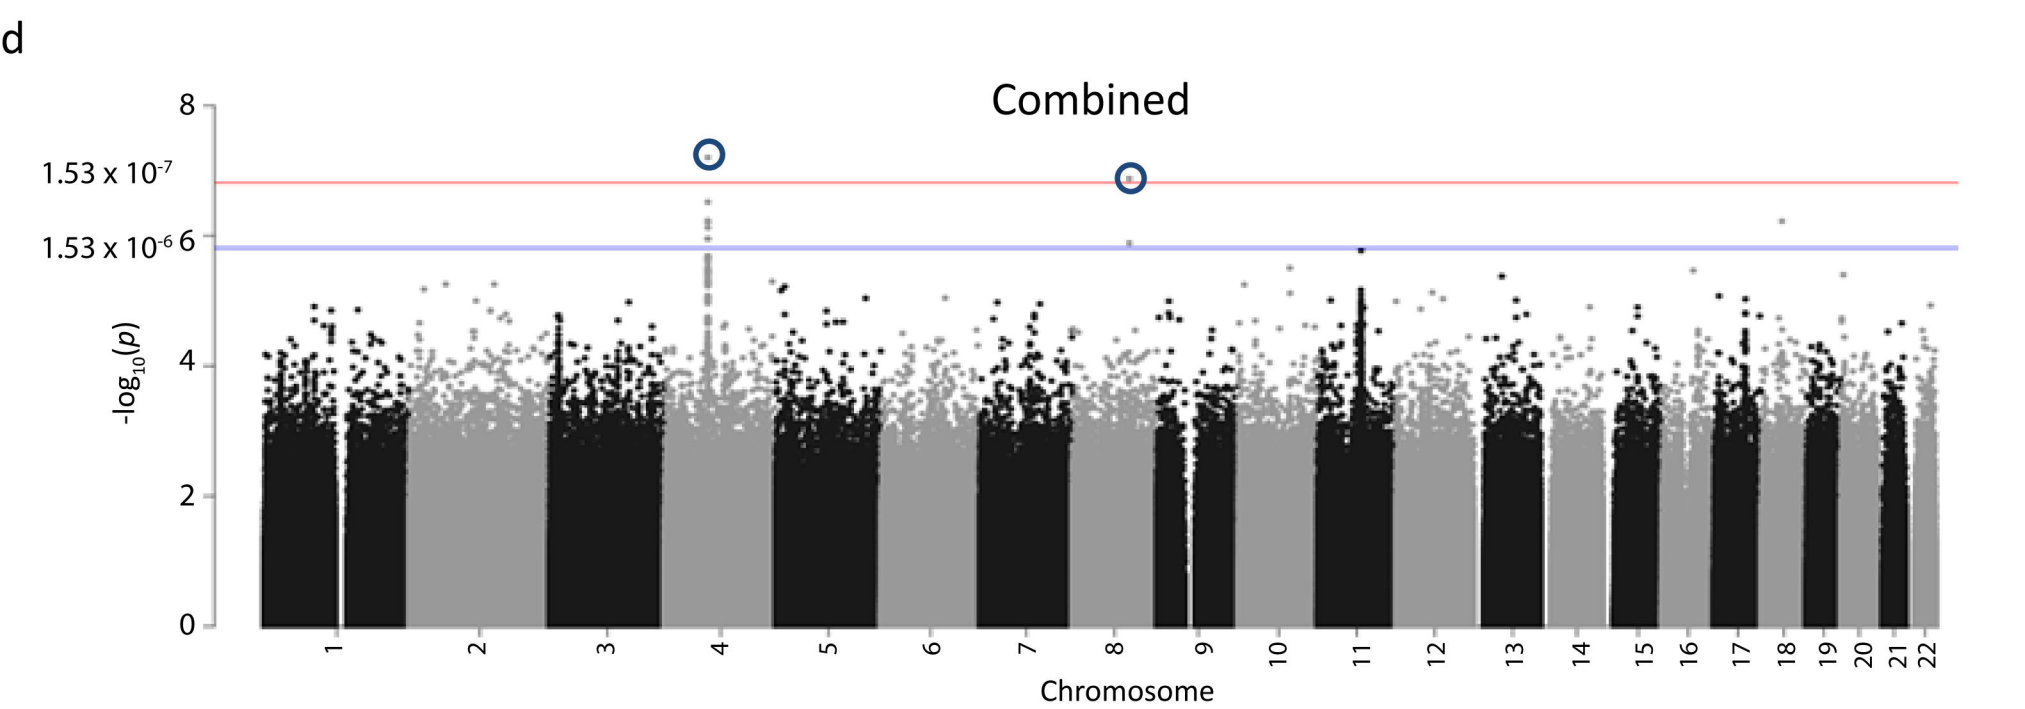

Source: https://www.biorxiv.org/content/biorxiv/early/2017/09/15/128116.full.pdf
